# Supplementary material for: Surface-circulation change in the Southern Ocean across the Middle Eocene Climatic Optimum: inferences from dinoflagellate cysts and biomarker paleothermometry
Source: Copernicus journal article supplement (doi:10.5194/cp-2019-35), 2019-04-04
Supplement: Supplementary file 1 [file 1170 ms data for submission.xlsx]

## Sheet: 1170_Paly
Palynological data from ODP Site 1170 (this study)
Sample info	Relative palynomorph abundances at ODP Site 1170 (fraction of total palynomorphs)					Relative dinocyst abundances at ODP Site 1170 (fraction of total dinocysts)
Depth (mbsf)	dinocysts	Nothofagus pollen	other pollen	spores	acritarchs	Alterbidinium distinctum	Arachnodinium antarcticum	Cerebrocysta bartonensis	Cerebrocysta waipawaensis	Cordosphaeridium Cpx. (pars)	Cordosphaeridium fibrospinosum	Cordosphaeridium funiculatum	Cordosphaeridium minimum	Corrudinium incompositum	Deflandrea antarctica	Deflandrea convexa	Deflandrea cygniformis	Deflandrea phosphoritica	Deflandrea spp. (pars)	Elytrocysta brevis	Enneadocysta brevistila	Enneadocysta dictyostila	Enneadocysta multicornuta	Eocladopyxis peniculata	Eocladopyxis spp. (pars)	Glaphyrocysta pastielsii	Homotryblium spp.	Hystrichosphaeridium truswelliae	Impagidinium maculatum	Impagidinium parvireticulatum	Impagidinium spp. (pars)	Lejeunecysta spp. (pars)	Lophocysta sulcolimbata	Octodinium askinae	Operculodinium centrocarpum	Paucispaeridium spp.	Phthanoperidinium stockmansii	Selenopemphix spp.	Spinidinium colemanii	Spinidinium macmurdoense	Spinidinium schellenbergii	Spiniferites spp. (pars)	Tectatodinium pellitum	Thalassiphora pelagica	Vozzhennikovia apertura	Vozzhennikovia netrona	Vozzhennikovia spp. (pars)	Vozzhennikovia stickleyae	Dinocyst indet.
491.95	0.96139	0.00772201	0	0	0.030888	0.00401606	0	0	0	0	0	0	0.00401606	0	0	0.0321285	0.00401606	0.0321285	0.0562249	0	0	0.0120482	0	0	0	0.00401606	0	0	0.00401606	0	0.00803213	0.00401606	0	0.0361446	0	0.0200803	0.39759	0.00803213	0	0.0200803	0.0722892	0.0120482	0	0	0.156627	0.00401606	0.060241	0.00803213	0.0401606
503.05	0.94717	0.0150943	0.00377358	0	0.0339623	0	0	0.00398406	0.00398406	0	0	0	0	0	0.0756972	0.00398406	0	0	0.525896	0.00796813	0	0.00796813	0	0	0	0.00398406	0	0	0.00796813	0.00796813	0	0	0	0.0159363	0.00398406	0	0.143426	0	0	0.0677291	0.0398406	0.0159363	0	0.0119522	0.0159363	0	0.00796813	0	0.0278884
523.65	0.909774	0.0112782	0.0112782	0.0075188	0.0601504	0.0165289	0	0.0206612	0.00413223	0.00413223	0	0	0.00826446	0	0.0165289	0.00413223	0	0	0.297521	0.0123967	0.00826446	0.161157	0.00413223	0	0	0.107438	0	0	0.00413223	0	0.0206612	0	0	0.00826446	0.00413223	0.00413223	0.107438	0	0	0.0123967	0.00413223	0.0206612	0	0.0123967	0.053719	0.00413223	0.0289256	0.00413223	0.0454545
542.95	0.762215	0.019544	0	0	0.218241	0.00854701	0	0.0042735	0.00854701	0	0	0	0.0299145	0	0.025641	0.0042735	0	0.0042735	0.269231	0.034188	0.0042735	0.0598291	0	0	0	0	0	0.0128205	0.0042735	0.0042735	0.00854701	0.00854701	0	0.017094	0.0213675	0	0.0299145	0.0042735	0	0.017094	0.0213675	0.0641026	0	0	0.192308	0.0042735	0.0641026	0.00854701	0.0641026
552.55	0.868966	0.0103448	0	0.00344828	0.117241	0	0	0.00793651	0	0	0	0	0.00396825	0	0.0119048	0	0	0	0.146825	0.0595238	0	0.0555556	0	0	0	0	0	0.00396825	0.015873	0.00396825	0	0.00396825	0	0.015873	0.00396825	0	0	0	0	0.0277778	0.0396825	0.0753968	0	0.142857	0.230159	0.0198413	0.107143	0.00396825	0.0198413
558.3	0.907285	0.00331126	0.00331126	0	0.0860927	0	0	0	0.0145985	0	0	0	0	0	0.00729927	0.00729927	0.00364964	0	0.248175	0	0	0.0583942	0	0	0	0	0	0.00364964	0	0.00364964	0.0109489	0	0	0.00364964	0.0145985	0.00364964	0	0.00729927	0	0.0218978	0.00729927	0.0839416	0	0.00364964	0.332117	0.00729927	0.153285	0	0.00364964
562.79	0.859107	0.0137457	0.00687285	0.00343643	0.116838	0	0.008	0	0.028	0	0	0	0	0	0.02	0.012	0	0	0.276	0.008	0	0.148	0	0	0	0	0	0	0	0.004	0	0.004	0	0.004	0.008	0.004	0	0	0	0.036	0.028	0.048	0	0.056	0.216	0.004	0.08	0	0.008
568.75	0.821538	0.0153846	0	0	0.163077	0	0.011236	0.00749064	0.00374532	0.00374532	0	0	0.0262172	0	0.00749064	0	0	0	0.23221	0.00374532	0	0.082397	0	0	0	0	0.00374532	0.00374532	0	0.00374532	0	0.00374532	0.00374532	0.00374532	0.0299625	0.0636704	0.0299625	0	0	0.0374532	0.00749064	0.0224719	0	0.17603	0.149813	0.011236	0.0411985	0	0.0299625
573.25	0.831832	0.012012	0.00900901	0	0.147147	0	0.0108303	0.00722022	0.00722022	0	0	0	0.00722022	0	0.0144404	0	0	0	0.187726	0.0180505	0.00361011	0.137184	0	0	0	0	0	0.0144404	0	0.0144404	0.00361011	0	0	0.0252708	0.0288809	0.0144404	0.0974729	0.00722022	0	0.00722022	0.0397112	0.0180505	0	0.0252708	0.259928	0.00722022	0.0108303	0.00361011	0.0288809
576.25	0.777328	0.0445344	0.00404858	0	0.174089	0	0.0104167	0.0104167	0	0	0	0	0	0	0.046875	0	0	0	0.239583	0	0	0.244792	0.00520833	0	0	0	0	0	0	0	0.0208333	0.00520833	0	0.0104167	0.0416667	0.0208333	0.0104167	0.015625	0	0	0.078125	0.0416667	0.0208333	0.00520833	0.145833	0.00520833	0	0	0.0208333
579.85	0.942623	0.0122951	0.00409836	0	0.0409836	0	0	0	0.00434783	0	0	0	0.00434783	0	0.0130435	0	0	0	0.0826087	0	0	0.778261	0.0130435	0	0	0	0	0.0130435	0	0.00434783	0	0.00434783	0	0	0.00869565	0	0.00434783	0	0	0	0.00869565	0.0130435	0	0.0173913	0.0304348	0	0	0	0
582.85	0.928571	0.00793651	0.00793651	0.00396825	0.0515873	0	0.0042735	0.0042735	0.0042735	0	0	0	0	0	0	0.0042735	0	0	0.106838	0.0042735	0.00854701	0.58547	0	0	0	0	0	0.0042735	0	0	0	0	0	0.00854701	0.017094	0.0128205	0.0470085	0.0042735	0	0.0042735	0.00854701	0.0299145	0	0.0299145	0.0598291	0	0.0213675	0.0042735	0.025641
588.37	0.971074	0.00826446	0	0	0.0206612	0	0	0.00425532	0	0	0	0	0.00851064	0	0.00425532	0.00425532	0	0	0.0255319	0	0.012766	0.67234	0	0.00425532	0	0	0	0	0	0	0.00425532	0	0	0.00851064	0.00851064	0.00425532	0.00851064	0.00425532	0	0	0.0170213	0.00425532	0	0.0170213	0.140426	0.0170213	0.012766	0.00425532	0.012766
591.37	0.997409	0	0	0	0.00259067	0	0	0	0	0.0025974	0	0	0	0	0.00779221	0	0	0	0.0311688	0	0.0155844	0.888312	0	0	0	0	0	0.00519481	0	0	0	0	0	0	0.00519481	0	0	0	0	0.0025974	0.0025974	0	0	0.0025974	0.025974	0.0025974	0.0025974	0	0.00519481
595.87	0.933993	0	0	0.00330033	0.0627063	0	0	0.00353357	0	0	0	0	0.00706714	0	0.00353357	0.00353357	0	0	0.0212014	0	0.00353357	0.5053	0	0.00706714	0	0	0	0.0106007	0	0.00353357	0.00706714	0.00353357	0	0.0106007	0	0	0.0318021	0	0	0	0.0106007	0.0176678	0	0.0141343	0.279152	0.00353357	0.0353357	0	0.0176678
597.6	0.94958	0	0	0	0.0504202	0	0.0058997	0	0.0058997	0.00294985	0	0	0.00884956	0	0.00294985	0	0	0	0.188791	0.00294985	0.0058997	0.351032	0	0	0	0	0	0.00294985	0	0	0.00294985	0.00294985	0	0.00294985	0.0058997	0	0.00294985	0	0	0.00294985	0.0176991	0.0147493	0	0.0117994	0.244838	0.00884956	0.0914454	0	0.0117994
600.58	0.950156	0.00623053	0.00311526	0	0.0404984	0.00655738	0	0	0	0	0	0	0.00655738	0	0.00655738	0	0	0	0.134426	0.00327869	0.00327869	0.160656	0.00327869	0.00327869	0	0	0	0.00327869	0	0.00327869	0.00327869	0.00655738	0	0.00983607	0.0262295	0	0.00983607	0.0131148	0	0.00327869	0.0131148	0.0360656	0.00327869	0.042623	0.429508	0.00655738	0.042623	0	0.0196721
603.58	0.898773	0	0	0	0.101227	0	0.00682594	0	0	0	0	0	0	0	0	0	0	0	0.0853242	0	0.00682594	0.484642	0	0	0	0	0	0	0	0	0.00341297	0.00341297	0	0.00341297	0.00682594	0	0.00682594	0	0	0	0.0102389	0.0307167	0	0.0102389	0.334471	0.00682594	0	0	0
608.65	0.867424	0	0	0	0.132576	0	0.00436681	0.00436681	0	0	0	0	0	0	0.0480349	0	0	0	0.196507	0	0.00436681	0.371179	0.00436681	0.00436681	0	0	0	0	0.00436681	0.00873362	0.00436681	0.00436681	0	0.00436681	0	0.00873362	0.0174672	0	0	0	0.00873362	0.0305677	0	0.0655022	0.20524	0	0	0	0
611.65	0.934256	0.0138408	0.00346021	0.00346021	0.0449827	0.0037037	0.0037037	0	0.0037037	0	0	0	0.0111111	0	0.0111111	0.0037037	0	0	0.1	0	0.037037	0.433333	0	0.0148148	0	0	0	0.0037037	0	0	0.0037037	0	0	0.0185185	0.0037037	0.0037037	0.0518519	0	0	0.0111111	0.0037037	0.0148148	0.00740741	0.103704	0.133333	0.0111111	0	0.0037037	0.0037037
613.15	0.871681	0.00442478	0.00442478	0	0.119469	0	0.00507614	0.0101523	0	0	0	0	0	0	0.0203046	0	0	0	0.182741	0.00507614	0	0.456853	0	0	0	0	0	0	0	0	0.00507614	0	0	0	0.0253807	0.00507614	0.0101523	0	0	0	0.0101523	0.0253807	0.00507614	0.0203046	0.203046	0.00507614	0	0	0.00507614
613.8	0.940945	0.00393701	0	0	0.0551181	0.0041841	0	0	0.0041841	0	0	0	0	0	0.0292887	0.0041841	0	0	0.284519	0.0041841	0.0041841	0.297071	0	0	0	0	0	0	0	0.0209205	0	0	0	0	0.0251046	0	0.0083682	0.0041841	0	0	0.0083682	0.0794979	0	0.108787	0.0753138	0	0.0376569	0	0
615.9	0.95	0.00357143	0	0.00357143	0.0428571	0	0.0037594	0	0.0112782	0	0	0	0	0	0.0977444	0.0150376	0.0037594	0	0.360902	0	0.0037594	0.161654	0	0	0	0	0	0	0	0.0112782	0.0037594	0	0	0.0037594	0.037594	0	0	0	0	0	0	0.037594	0	0.109023	0.075188	0.0037594	0.0413534	0.0037594	0.0150376
616.25	0.948276	0.00862069	0	0	0.0431034	0	0.00454546	0	0.00909091	0	0	0	0	0	0.00454546	0	0	0	0.113636	0	0.00909091	0.513636	0	0	0	0	0	0	0	0	0.00909091	0.00909091	0	0	0.0272727	0	0.0136364	0	0	0	0	0.0454545	0	0.0454545	0.145455	0	0.0363636	0.00454546	0.00909091
618.6	0.979263	0	0	0	0.0207373	0	0.00470588	0	0.00235294	0	0	0	0	0	0	0	0	0	0.0847059	0.00235294	0.0141176	0.538824	0	0.00235294	0	0	0.00235294	0.00470588	0	0.00235294	0.00235294	0	0	0.00235294	0.0117647	0.00705882	0.00470588	0	0	0	0.00235294	0.0282353	0	0.00235294	0.225882	0	0.0470588	0	0.00705882
619.25	0.954717	0.00377358	0	0.00377358	0.0377358	0.00395257	0	0	0	0	0	0	0	0	0.0237154	0.00395257	0	0	0.16996	0.00790514	0	0.486166	0	0	0	0	0	0.00395257	0	0	0	0	0	0.00395257	0.0118577	0	0.00395257	0	0	0.00395257	0.00395257	0.0316206	0	0.0355731	0.166008	0	0.0355731	0.00395257	0
621.6	0.936759	0	0	0	0.0632411	0	0.00843882	0	0	0	0	0	0	0	0	0	0	0	0.126582	0	0	0.447257	0	0	0	0	0	0.00843882	0	0.00421941	0.0337553	0	0	0.00421941	0.0337553	0.00421941	0.0126582	0	0	0.00421941	0.0126582	0.0253165	0	0.00421941	0.253165	0.0168776	0	0	0
627.95	0.885794	0	0.00278552	0	0.111421	0	0	0	0	0	0	0	0	0	0.0157233	0.00314465	0	0	0.22327	0	0.0157233	0.41195	0.0188679	0	0	0	0	0.00628931	0	0	0.0125786	0	0	0.00314465	0.0188679	0	0.0125786	0.00314465	0	0	0.00943396	0.0220126	0.00628931	0.0188679	0.194969	0.00314465	0	0	0
632.45	0.940972	0	0	0	0.0590278	0	0.00738007	0.00369004	0.00369004	0	0	0	0	0	0.0738007	0.00369004	0	0	0.369004	0.00369004	0	0.225092	0.00369004	0	0	0	0	0	0	0.00369004	0	0	0	0.00369004	0	0	0.00369004	0	0	0.00369004	0.0110701	0.0110701	0	0.0405904	0.221402	0.00369004	0	0	0.00369004
637.65	0.975664	0	0	0	0.0243363	0	0.00453515	0	0.00453515	0	0	0	0	0	0.00453515	0	0	0	0.217687	0.00226757	0.015873	0.512472	0.00226757	0.00226757	0	0	0.00226757	0	0.00453515	0.00226757	0	0.00226757	0	0	0.0113379	0	0	0.00226757	0	0	0	0.0544218	0	0.00680272	0.0861678	0	0.0498866	0	0.0113379
650.15	0.994737	0	0	0	0.00526316	0	0.010582	0.0026455	0	0	0	0	0	0	0.005291	0	0	0	0.111111	0	0.031746	0.732804	0.0132275	0.00793651	0	0	0	0	0.0026455	0	0	0	0	0.005291	0.0026455	0	0	0	0	0	0	0.005291	0	0.0185185	0.0291005	0.005291	0.0026455	0	0.0132275
662.95	0.989071	0	0	0.00273224	0.00819672	0	0.0110497	0.00276243	0	0	0	0	0	0	0	0	0	0.00276243	0.171271	0.00276243	0.0138122	0.665746	0.00828729	0.00552486	0	0	0	0	0.00828729	0	0.00276243	0.00276243	0	0	0.0303867	0	0	0.00276243	0	0	0	0.0110497	0	0.00552486	0.0414365	0.00276243	0	0.00276243	0.00552486
679.99	0.994129	0	0	0	0.00587084	0.0019685	0.0019685	0	0.00393701	0	0	0	0	0	0.0137795	0.0019685	0	0.0019685	0.0944882	0	0.019685	0.755906	0.0216535	0.00590551	0	0	0	0	0.0019685	0	0	0	0	0.00787402	0.00393701	0	0	0	0	0	0.00590551	0	0	0.00787402	0.0374016	0	0.00787402	0	0.00393701
688.71	0.966942	0	0	0	0.0330579	0	0.017094	0.0042735	0	0.0042735	0.0299145	0	0	0	0.017094	0	0	0	0.119658	0	0.0213675	0.42735	0	0.0299145	0.00854701	0	0	0	0	0	0.0042735	0	0	0.0042735	0	0	0.00854701	0.0042735	0	0	0	0.017094	0	0.145299	0.115385	0.00854701	0	0	0.0128205
701.21	0.857143	0.0031746	0	0	0.139683	0.00740741	0.00740741	0	0.0518519	0	0.00740741	0.0037037	0.0111111	0	0	0.0037037	0	0	0.196296	0.0185185	0.0037037	0.0703704	0.0185185	0.0185185	0	0	0	0	0.0222222	0	0.0111111	0.0037037	0	0.0148148	0	0.00740741	0	0	0	0.0444444	0.0222222	0.0666667	0	0.0259259	0.262963	0.0037037	0.0666667	0	0.0296296
703.65	0.942308	0.00641026	0	0	0.0512821	0.0204082	0.00340136	0.00340136	0.0442177	0.00340136	0.00680272	0.00340136	0	0	0.00680272	0	0	0	0.0884354	0.0136054	0.00680272	0.0782313	0.0102041	0.0102041	0	0	0	0	0.00680272	0.0714286	0	0	0	0.00340136	0.00680272	0.0102041	0	0.00680272	0	0.037415	0.0102041	0.0136054	0.00340136	0.00680272	0.340136	0.00340136	0.129252	0.0102041	0.0408163
714.75	0.942652	0.00716846	0	0	0.0501792	0.00380228	0	0.00380228	0.0152091	0	0.0228137	0.00380228	0.00380228	0	0	0.00380228	0	0.00380228	0.0418251	0.0114068	0.00380228	0.0836502	0.0228137	0	0	0	0.00380228	0	0.00760456	0.00380228	0.00760456	0	0	0.00380228	0	0	0.00760456	0	0	0	0.0114068	0.026616	0	0.00760456	0.456274	0.0190114	0.178707	0	0.0418251
725.85	0.9631	0.00369004	0.00369004	0	0.0295203	0.0229885	0.00383142	0	0.00766283	0.0191571	0.0114943	0.00383142	0.00383142	0	0	0	0	0.00383142	0.118774	0.0268199	0.00383142	0.0153257	0	0	0	0	0	0	0.0229885	0	0.00383142	0	0	0	0	0.00383142	0.00766283	0.00383142	0	0.0153257	0.0306513	0.0191571	0	0.00383142	0.429119	0.0383142	0.122605	0	0.0574713
736.95	0.912409	0.00729927	0	0	0.080292	0.004	0.004	0.008	0.032	0	0	0	0.004	0.004	0.016	0	0	0.004	0.244	0	0.004	0.116	0	0.02	0	0	0	0	0	0	0.004	0	0	0	0.004	0	0	0.004	0	0.004	0	0.012	0.008	0	0.38	0.016	0.084	0.008	0.016
746.55	0.929961	0.0077821	0.00389105	0	0.0583658	0.0041841	0	0.0041841	0.0292887	0.0041841	0	0	0	0	0	0	0	0	0.104603	0	0.0041841	0.100418	0.0041841	0.0041841	0	0	0.0041841	0.0083682	0	0	0.0041841	0	0	0	0.0041841	0	0	0	0	0.0083682	0.0083682	0.0041841	0.0041841	0.0585774	0.548117	0.0041841	0.0502092	0.0209205	0.0125523
753.15	0.873494	0.00301205	0	0	0.123494	0.00344828	0.00689655	0	0.0137931	0	0.00344828	0	0	0	0.0172414	0	0	0	0.106897	0	0	0.158621	0.00689655	0.0206897	0	0	0	0.0206897	0	0	0.00344828	0	0	0	0.0137931	0	0.00344828	0.00689655	0	0.00344828	0.00689655	0.0482759	0	0.0310345	0.382759	0.0103448	0.062069	0.0482759	0.0206897
765.85	0.965649	0	0	0	0.0343511	0	0.00395257	0.00395257	0.0118577	0	0.00790514	0	0	0.00395257	0.0118577	0.00395257	0	0	0.0671937	0.00395257	0.00395257	0.296443	0.0237154	0.0158103	0	0	0.00395257	0.00790514	0.055336	0.0118577	0	0	0	0	0.00395257	0	0.00395257	0.00790514	0	0	0	0.0355731	0	0.3083	0.0790514	0	0.00790514	0.00790514	0.00790514
773.93	0.955774	0.002457	0	0.002457	0.039312	0	0.00257069	0.00514139	0.00257069	0	0	0.00514139	0	0	0	0	0	0	0.0462725	0	0.0102828	0.755784	0.0154242	0.0616967	0	0	0.00257069	0	0.00514139	0	0	0	0	0	0.00257069	0	0.00771208	0	0	0	0	0.00257069	0	0.00257069	0.0616967	0	0	0	0.0102828
Sample info	Estimated absolute palynomorph abundances at ODP Site 1170 (number of palynomorphs per gram dry weight sediment)					Estimated absolute dinocyst abundances at ODP Site 1170 (number of dinocysts per gram dry weight sediment)
Depth (mbsf)	dinocysts	Nothofagus pollen	other pollen	spores	acritarchs	Alterbidinium distinctum	Arachnodinium antarcticum	Cerebrocysta bartonensis	Cerebrocysta waipawaensis	Cordosphaeridium Cpx. (pars)	Cordosphaeridium fibrospinosum	Cordosphaeridium funiculatum	Cordosphaeridium minimum	Corrudinium incompositum	Deflandrea antarctica	Deflandrea convexa	Deflandrea cygniformis	Deflandrea phosphoritica	Deflandrea spp. (pars)	Elytrocysta brevis	Enneadocysta brevistila	Enneadocysta dictyostila	Enneadocysta multicornuta	Eocladopyxis peniculata	Eocladopyxis spp. (pars)	Glaphyrocysta pastielsii	Homotryblium spp.	Hystrichosphaeridium truswelliae	Impagidinium maculatum	Impagidinium parvireticulatum	Impagidinium spp. (pars)	Lejeunecysta spp. (pars)	Lophocysta sulcolimbata	Octodinium askinae	Operculodinium centrocarpum	Paucispaeridium spp.	Phthanoperidinium stockmansii	Selenopemphix spp.	Spinidinium colemanii	Spinidinium macmurdoense	Spinidinium schellenbergii	Spiniferites spp. (pars)	Tectatodinium pellitum	Thalassiphora pelagica	Vozzhennikovia apertura	Vozzhennikovia netrona	Vozzhennikovia spp. (pars)	Vozzhennikovia stickleyae	Dinocyst indet.
491.95	NA	NA	NA	NA	NA	NA	NA	NA	NA	NA	NA	NA	NA	NA	NA	NA	NA	NA	NA	NA	NA	NA	NA	NA	NA	NA	NA	NA	NA	NA	NA	NA	NA	NA	NA	NA	NA	NA	NA	NA	NA	NA	NA	NA	NA	NA	NA	NA	NA
503.05	18701.4	298.031	74.5076	0	670.569	0	0	74.5076	74.5076	0	0	0	0	0	1415.64	74.5076	0	0	9835.01	149.015	0	149.015	0	0	0	74.5076	0	0	149.015	149.015	0	0	0	298.031	74.5076	0	2682.27	0	0	1266.63	745.076	298.031	0	223.523	298.031	0	149.015	0	521.553
523.65	16516.7	204.752	204.752	136.502	1092.01	273.003	0	341.254	68.2508	68.2508	0	0	136.502	0	273.003	68.2508	0	0	4914.06	204.752	136.502	2661.78	68.2508	0	0	1774.52	0	0	68.2508	0	341.254	0	0	136.502	68.2508	68.2508	1774.52	0	0	204.752	68.2508	341.254	0	204.752	887.26	68.2508	477.756	68.2508	750.759
542.95	15549.6	398.708	0	0	4452.23	132.903	0	66.4512	132.903	0	0	0	465.159	0	398.708	66.4512	0	66.4512	4186.43	531.61	66.4512	930.318	0	0	0	0	0	199.354	66.4512	66.4512	132.903	132.903	0	265.805	332.256	0	465.159	66.4512	0	265.805	332.256	996.769	0	0	2990.31	66.4512	996.769	132.903	996.769
552.55	27285.1	324.823	0	108.274	3681.33	0	0	216.549	0	0	0	0	108.274	0	324.823	0	0	0	4006.15	1624.12	0	1515.84	0	0	0	0	0	108.274	433.097	108.274	0	108.274	0	433.097	108.274	0	0	0	0	757.921	1082.74	2057.21	0	3897.88	6279.91	541.372	2923.41	108.274	541.372
558.3	20489.1	74.7776	74.7776	0	1944.22	0	0	0	299.11	0	0	0	0	0	149.555	149.555	74.7776	0	5084.88	0	0	1196.44	0	0	0	0	0	74.7776	0	74.7776	224.333	0	0	74.7776	299.11	74.7776	0	149.555	0	448.666	149.555	1719.89	0	74.7776	6804.76	149.555	3140.66	0	74.7776
562.79	8811.08	140.977	70.4886	35.2443	1198.31	0	70.4886	0	246.71	0	0	0	0	0	176.222	105.733	0	0	2431.86	70.4886	0	1304.04	0	0	0	0	0	0	0	35.2443	0	35.2443	0	35.2443	70.4886	35.2443	0	0	0	317.199	246.71	422.932	0	493.42	1903.19	35.2443	704.886	0	70.4886
568.75	21198	396.966	0	0	4207.84	0	238.179	158.786	79.3931	79.3931	0	0	555.752	0	158.786	0	0	0	4922.37	79.3931	0	1746.65	0	0	0	0	79.3931	79.3931	0	79.3931	0	79.3931	79.3931	79.3931	635.145	1349.68	635.145	0	0	793.931	158.786	476.359	0	3731.48	3175.72	238.179	873.324	0	635.145
573.25	22342.4	322.634	241.976	0	3952.27	0	241.976	161.317	161.317	0	0	0	161.317	0	322.634	0	0	0	4194.24	403.293	80.6585	3065.02	0	0	0	0	0	322.634	0	322.634	80.6585	0	0	564.61	645.268	322.634	2177.78	161.317	0	161.317	887.244	403.293	0	564.61	5807.41	161.317	241.976	80.6585	645.268
576.25	9652.68	553.018	50.2744	0	2161.8	0	100.549	100.549	0	0	0	0	0	0	452.469	0	0	0	2312.62	0	0	2362.9	50.2744	0	0	0	0	0	0	0	201.098	50.2744	0	100.549	402.195	201.098	100.549	150.823	0	0	754.116	402.195	201.098	50.2744	1407.68	50.2744	0	0	201.098
579.85	47699.1	622.163	207.388	0	2073.88	0	0	0	207.388	0	0	0	207.388	0	622.163	0	0	0	3940.36	0	0	37122.4	622.163	0	0	0	0	622.163	0	207.388	0	207.388	0	0	414.775	0	207.388	0	0	0	414.775	622.163	0	829.55	1451.71	0	0	0	0
582.85	88610.9	757.358	757.358	378.679	4922.83	0	378.679	378.679	378.679	0	0	0	0	0	0	378.679	0	0	9466.98	378.679	757.358	51879.1	0	0	0	0	0	378.679	0	0	0	0	0	757.358	1514.72	1136.04	4165.47	378.679	0	378.679	757.358	2650.75	0	2650.75	5301.51	0	1893.4	378.679	2272.08
588.37	124768	1061.86	0	0	2654.64	0	0	530.928	0	0	0	0	1061.86	0	530.928	530.928	0	0	3185.57	0	1592.78	83886.6	0	530.928	0	0	0	0	0	0	530.928	0	0	1061.86	1061.86	530.928	1061.86	530.928	0	0	2123.71	530.928	0	2123.71	17520.6	2123.71	1592.78	530.928	1592.78
591.37	740071	0	0	0	1922.26	0	0	0	0	1922.26	0	0	0	0	5766.79	0	0	0	23067.2	0	11533.6	657414	0	0	0	0	0	3844.53	0	0	0	0	0	0	3844.53	0	0	0	0	1922.26	1922.26	0	0	1922.26	19222.6	1922.26	1922.26	0	3844.53
595.87	206356	0	0	729.174	13854.3	0	0	729.174	0	0	0	0	1458.35	0	729.174	729.174	0	0	4375.04	0	729.174	104272	0	1458.35	0	0	0	2187.52	0	729.174	1458.35	729.174	0	2187.52	0	0	6562.57	0	0	0	2187.52	3645.87	0	2916.7	57604.7	729.174	7291.74	0	3645.87
597.6	390177	0	0	0	20717.4	0	2301.93	0	2301.93	1150.97	0	0	3452.9	0	1150.97	0	0	0	73661.8	1150.97	2301.93	136965	0	0	0	0	0	1150.97	0	0	1150.97	1150.97	0	1150.97	2301.93	0	1150.97	0	0	1150.97	6905.79	5754.83	0	4603.86	95530.1	3452.9	35679.9	0	4603.86
600.58	108478	711.329	355.664	0	4623.64	711.329	0	0	0	0	0	0	711.329	0	711.329	0	0	0	14582.2	355.664	355.664	17427.6	355.664	355.664	0	0	0	355.664	0	355.664	355.664	711.329	0	1066.99	2845.31	0	1066.99	1422.66	0	355.664	1422.66	3912.31	355.664	4623.64	46592	711.329	4623.64	0	2133.99
603.58	152143	0	0	0	17135.6	0	1038.52	0	0	0	0	0	0	0	0	0	0	0	12981.5	0	1038.52	73734.9	0	0	0	0	0	0	0	0	519.259	519.259	0	519.259	1038.52	0	1038.52	0	0	0	1557.78	4673.34	0	1557.78	50887.4	1038.52	0	0	0
608.65	92060.7	0	0	0	14070.4	0	402.012	402.012	0	0	0	0	0	0	4422.13	0	0	0	18090.5	0	402.012	34171	402.012	402.012	0	0	0	0	402.012	804.024	402.012	402.012	0	402.012	0	804.024	1608.05	0	0	0	804.024	2814.08	0	6030.18	18894.6	0	0	0	0
611.65	59436.7	880.544	220.136	220.136	2861.77	220.136	220.136	0	220.136	0	0	0	660.408	0	660.408	220.136	0	0	5943.67	0	2201.36	25755.9	0	880.544	0	0	0	220.136	0	0	220.136	0	0	1100.68	220.136	220.136	3081.9	0	0	660.408	220.136	880.544	440.272	6163.81	7924.9	660.408	0	220.136	220.136
613.15	69535.3	352.971	352.971	0	9530.21	0	352.971	705.942	0	0	0	0	0	0	1411.88	0	0	0	12707	352.971	0	31767.4	0	0	0	0	0	0	0	0	352.971	0	0	0	1764.85	352.971	705.942	0	0	0	705.942	1764.85	352.971	1411.88	14118.8	352.971	0	0	352.971
613.8	22059.2	92.298	0	0	1292.17	92.298	0	0	92.298	0	0	0	0	0	646.086	92.298	0	0	6276.27	92.298	92.298	6553.16	0	0	0	0	0	0	0	461.49	0	0	0	0	553.788	0	184.596	92.298	0	0	184.596	1753.66	0	2399.75	1661.36	0	830.682	0	0
615.9	42359.1	159.245	0	159.245	1910.94	0	159.245	0	477.734	0	0	0	0	0	4140.36	636.979	159.245	0	15287.5	0	159.245	6847.52	0	0	0	0	0	0	0	477.734	159.245	0	0	159.245	1592.45	0	0	0	0	0	0	1592.45	0	4618.1	3184.89	159.245	1751.69	159.245	636.979
616.25	18838	171.254	0	0	856.272	0	85.6272	0	171.254	0	0	0	0	0	85.6272	0	0	0	2140.68	0	171.254	9675.88	0	0	0	0	0	0	0	0	171.254	171.254	0	0	513.763	0	256.882	0	0	0	0	856.272	0	856.272	2740.07	0	685.018	85.6272	171.254
618.6	495250	0	0	0	10487.6	0	2330.59	0	1165.29	0	0	0	0	0	0	0	0	0	41950.6	1165.29	6991.76	266852	0	1165.29	0	0	1165.29	2330.59	0	1165.29	1165.29	0	0	1165.29	5826.47	3495.88	2330.59	0	0	0	1165.29	13983.5	0	1165.29	111868	0	23305.9	0	3495.88
619.25	35915.5	141.958	0	141.958	1419.58	141.958	0	0	0	0	0	0	0	0	851.75	141.958	0	0	6104.21	283.917	0	17460.9	0	0	0	0	0	141.958	0	0	0	0	0	141.958	425.875	0	141.958	0	0	141.958	141.958	1135.67	0	1277.62	5962.25	0	1277.62	141.958	0
621.6	85467.4	0	0	0	5769.95	0	721.244	0	0	0	0	0	0	0	0	0	0	0	10818.7	0	0	38225.9	0	0	0	0	0	721.244	0	360.622	2884.98	0	0	360.622	2884.98	360.622	1081.87	0	0	360.622	1081.87	2163.73	0	360.622	21637.3	1442.49	0	0	0
627.95	160256	0	503.948	0	20157.9	0	0	0	0	0	0	0	0	0	2519.74	503.948	0	0	35780.3	0	2519.74	66017.3	3023.69	0	0	0	0	1007.9	0	0	2015.79	0	0	503.948	3023.69	0	2015.79	503.948	0	0	1511.85	3527.64	1007.9	3023.69	31244.8	503.948	0	0	0
632.45	194479	0	0	0	12199.8	0	1435.27	717.634	717.634	0	0	0	0	0	14352.7	717.634	0	0	71763.4	717.634	0	43775.7	717.634	0	0	0	0	0	0	717.634	0	0	0	717.634	0	0	717.634	0	0	717.634	2152.9	2152.9	0	7893.98	43058.1	717.634	0	0	717.634
637.65	664615	0	0	0	16577.7	0	3014.13	0	3014.13	0	0	0	0	0	3014.13	0	0	0	144678	1507.06	10549.4	340596	1507.06	1507.06	0	0	1507.06	0	3014.13	1507.06	0	1507.06	0	0	7535.32	0	0	1507.06	0	0	0	36169.5	0	4521.19	57268.4	0	33155.4	0	7535.32
650.15	447663	0	0	0	2368.59	0	4737.18	1184.29	0	0	0	0	0	0	2368.59	0	0	0	49740.4	0	14211.5	328050	5921.47	3552.88	0	0	0	0	1184.29	0	0	0	0	2368.59	1184.29	0	0	0	0	0	0	2368.59	0	8290.06	13027.2	2368.59	1184.29	0	5921.47
662.95	241210	0	0	666.327	1998.98	0	2665.31	666.327	0	0	0	0	0	0	0	0	0	666.327	41312.3	666.327	3331.64	160585	1998.98	1332.65	0	0	0	0	1998.98	0	666.327	666.327	0	0	7329.6	0	0	666.327	0	0	0	2665.31	0	1332.65	9994.91	666.327	0	666.327	1332.65
679.99	906553	0	0	0	5353.66	1784.55	1784.55	0	3569.11	0	0	0	0	0	12491.9	1784.55	0	1784.55	85658.6	0	17845.5	685268	19630.1	5353.66	0	0	0	0	1784.55	0	0	0	0	7138.21	3569.11	0	0	0	0	0	5353.66	0	0	7138.21	33906.5	0	7138.21	0	3569.11
688.71	215463	0	0	0	7366.24	0	3683.12	920.78	0	920.78	6445.46	0	0	0	3683.12	0	0	0	25781.8	0	4603.9	92078	0	6445.46	1841.56	0	0	0	0	0	920.78	0	0	920.78	0	0	1841.56	920.78	0	0	0	3683.12	0	31306.5	24861.1	1841.56	0	0	2762.34
701.21	82734.4	306.424	0	0	13482.6	612.847	612.847	0	4289.93	0	612.847	306.424	919.271	0	0	306.424	0	0	16240.5	1532.12	306.424	5822.05	1532.12	1532.12	0	0	0	0	1838.54	0	919.271	306.424	0	1225.69	0	612.847	0	0	0	3677.08	1838.54	5515.63	0	2144.97	21756.1	306.424	5515.63	0	2451.39
703.65	178376	1213.44	0	0	9707.56	3640.33	606.723	606.723	7887.39	606.723	1213.44	606.723	0	0	1213.44	0	0	0	15774.8	2426.89	1213.44	13954.6	1820.17	1820.17	0	0	0	0	1213.44	12741.2	0	0	0	606.723	1213.44	1820.17	0	1213.44	0	6673.95	1820.17	2426.89	606.723	1213.44	60672.2	606.723	23055.5	1820.17	7280.67
714.75	112069	852.236	0	0	5965.65	426.118	0	426.118	1704.47	0	2556.71	426.118	426.118	0	0	426.118	0	426.118	4687.3	1278.35	426.118	9374.59	2556.71	0	0	0	426.118	0	852.236	426.118	852.236	0	0	426.118	0	0	852.236	0	0	0	1278.35	2982.83	0	852.236	51134.1	2130.59	20027.5	0	4687.3
725.85	260511	998.128	998.128	0	7985.03	5988.77	998.128	0	1996.26	4990.64	2994.38	998.128	998.128	0	0	0	0	998.128	30942	6986.9	998.128	3992.51	0	0	0	0	0	0	5988.77	0	998.128	0	0	0	0	998.128	1996.26	998.128	0	3992.51	7985.03	4990.64	0	998.128	111790	9981.28	31940.1	0	14971.9
736.95	215066	1720.53	0	0	18925.8	860.264	860.264	1720.53	6882.11	0	0	0	860.264	860.264	3441.06	0	0	860.264	52476.1	0	860.264	24947.7	0	4301.32	0	0	0	0	0	0	860.264	0	0	0	860.264	0	0	860.264	0	860.264	0	2580.79	1720.53	0	81725.1	3441.06	18065.6	1720.53	3441.06
746.55	151206	1265.32	632.662	0	9489.93	632.662	0	632.662	4428.64	632.662	0	0	0	0	0	0	0	0	15816.6	0	632.662	15183.9	632.662	632.662	0	0	632.662	1265.32	0	0	632.662	0	0	0	632.662	0	0	0	0	1265.32	1265.32	632.662	632.662	8857.27	82878.8	632.662	7591.95	3163.31	1897.99
753.15	133816	461.434	0	0	18918.8	461.434	922.868	0	1845.74	0	461.434	0	0	0	2307.17	0	0	0	14304.4	0	0	21226	922.868	2768.6	0	0	0	2768.6	0	0	461.434	0	0	0	1845.74	0	461.434	922.868	0	461.434	922.868	6460.07	0	4152.9	51219.2	1384.3	8305.81	6460.07	2768.6
765.85	234287	0	0	0	8334.31	0	926.034	926.034	2778.1	0	1852.07	0	0	926.034	2778.1	926.034	0	0	15742.6	926.034	926.034	69452.5	5556.2	3704.14	0	0	926.034	1852.07	12964.5	2778.1	0	0	0	0	926.034	0	926.034	1852.07	0	0	0	8334.31	0	72230.6	18520.7	0	1852.07	1852.07	1852.07
773.93	257821	662.779	0	662.779	10604.5	0	662.779	1325.56	662.779	0	0	1325.56	0	0	0	0	0	0	11930	0	2651.12	194857	3976.67	15906.7	0	0	662.779	0	1325.56	0	0	0	0	0	662.779	0	1988.34	0	0	0	0	662.779	0	662.779	15906.7	0	0	0	2651.12

## Sheet: 1170_GDGT
Organic geochemical (GDGT) data from ODP Site 1170 (this study)
Sample info								Fractional abundances of iGDGTs
Leg	Site	Hole	Core	Section	Top sample interval	Bot sample interval	Depth (mbsf)	1302	1300	1298	1296	1292 (I)	1292' (VI)	ng iGDGT / g sediment	TEX86	BIT	SST (Kim et al. 2010 TEXH calibration)	SST (O'Brien et al. 2017 calibration)	Use? (no=0)
189	1170	D	10	2	85	87	503.06	0.452639	0.0466481	0.0283765	0.0062705	0.441565	0.0245006	21.11	0.559074	0.135946	21.3269	21.7102
189	1170	D	12	3	85	87	523.66	0.343679	0.0625033	0.0514629	0.0141924	0.496821	0.0313407	18.3483	0.608128	0.165445	23.8252	24.5957
189	1170	D	14	3	85	87	542.96	0.421771	0.0579749	0.0327879	0.00935944	0.456049	0.0220573	11.0381	0.525494	0.111343	19.4868	19.7349
189	1170	D	15	2	85	87	551.06	0.42962	0.0571699	0.0333886	0.00849092	0.446534	0.0247962	NA	0.538377	0.0814644	20.2063	20.4928
189	1170	D	15	3	85	87	552.56	0.46502	0.0555199	0.0358544	0.00813785	0.411782	0.0236856	28.1752	0.549343	0.0982202	20.8053	21.1378
189	1170	D	16	1	85	87	559.16	0.413451	0.0606395	0.0407938	0.0119441	0.450202	0.0229695	23.0534	0.555256	0.107988	21.1233	21.4857
189	1170	D	16	4	85	87	563.65	0.407241	0.0613099	0.038934	0.009644	0.456468	0.0264035	15.9163	0.550156	0.102113	20.8492	21.1856
189	1170	D	17	1	85	87	568.76	0.388158	0.0631527	0.0459012	0.0114291	0.455932	0.0354271	11.6639	0.594942	0.121714	23.1741	23.8201
189	1170	D	17	4	85	87	573.26	0.504405	0.0758359	0.0450111	0.00940505	0.341524	0.0238191	7.17335	0.507787	0.177111	18.4686	18.6933
189	1170	D	17	5	85	87	574.76	0.305673	0.0652793	0.0656247	0.0161471	0.492185	0.0550902	19.8497	0.677061	0.193411	27.0149	28.6507
189	1170	D	17	6	85	87	576.26	0.324026	0.0669017	0.0627085	0.0147718	0.484132	0.0474602	15.5734	0.651267	0.169283	25.8611	27.1333
189	1170	D	17	7	65	67	577.57	0.414878	0.0618741	0.0407725	0.0100858	0.439914	0.032475	8.11742	0.573892	0.124617	22.104	22.5819
189	1170	D	18	1	85	87	578.36	0.406464	0.0629791	0.0379532	0.00940543	0.447483	0.0357158	8.98325	0.568794	0.108249	21.8389	22.282
189	1170	D	18	2	85	87	579.86	0.358911	0.0698014	0.0460784	0.0173089	0.471631	0.0362685	8.31128	0.588088	0.0988718	22.8299	23.4169	0
189	1170	D	18	3	85	87	581.36	0.227385	0.0557141	0.0659514	0.0134856	0.572891	0.0645733	4.24829	0.721045	0.13225	28.8846	31.2379
189	1170	D	18	4	85	87	582.86	0.341308	0.064787	0.0517572	0.0119078	0.484998	0.0452423	9.88747	0.627006	0.145463	24.7334	25.7062
189	1170	D	18	5	85	87	584.36	0.319943	0.0661216	0.0571158	0.0141012	0.48821	0.0545088	10.1347	0.655343	0.209607	26.0464	27.3731
189	1170	D	18	6	58	60	585.1	0.414792	0.0618484	0.0346277	0.00949947	0.448123	0.0311094	19.9489	0.548832	0.0766178	20.7776	21.1077
189	1170	D	19	1	10	12	587.2	0.361194	0.0646467	0.0432512	0.0107438	0.476223	0.0439414	14.0629	0.602377	0.119261	23.543	24.2575
189	1170	D	19	2	85	87	588.38	0.351053	0.0639697	0.0483673	0.0134849	0.483673	0.0394517	27.0567	0.612947	0.148168	24.0597	24.8792
189	1170	D	19	3	85	87	589.88	0.326437	0.0645977	0.0551724	0.0133333	0.489655	0.0508046	31.5387	0.64875	0.163974	25.7461	26.9853
189	1170	D	19	4	85	87	591.38	0.353078	0.0662795	0.0483159	0.0123113	0.476965	0.0430507	19.823	0.610023	0.12572	23.9177	24.7072
189	1170	D	19	5	85	87	592.88	0.35822	0.0594812	0.040987	0.0108132	0.488179	0.0423199	18.9764	0.612756	0.108935	24.0505	24.868
189	1170	D	19	6	85	87	594.41	0.340175	0.0608913	0.0509128	0.0128132	0.484182	0.0510262	36.4741	0.653325	0.125072	25.9548	27.2544
189	1170	D	19	7	85	87	595.88	0.368662	0.0636321	0.0462932	0.0111777	0.469665	0.0405697	24.9248	0.606414	0.0979923	23.7414	24.4949
189	1170	D	19	8	48	50	596.73	0.344264	0.0649579	0.0535243	0.0140721	0.474934	0.0482473	26.8922	0.640723	0.134397	25.3762	26.5131
189	1170	D	20	1	90	92	597.61	0.389659	0.0602623	0.034316	0.00976472	0.466846	0.0391519	32.8807	0.580039	0.0931098	22.4205	22.9435
189	1170	D	20	2	85	87	599.09	0.349674	0.0655085	0.0517871	0.0131681	0.472502	0.0473608	27.3388	0.631612	0.120223	24.9508	25.9772
189	1170	D	20	3	85	87	600.59	0.364182	0.0636318	0.0452226	0.0113057	0.461231	0.0544272	24.5712	0.63553	0.0837176	25.1345	26.2077
189	1170	D	20	4	85	87	602.09	0.341994	0.0654188	0.049951	0.0123317	0.478224	0.0520796	20.9465	0.63612	0.127327	25.1621	26.2423
189	1170	D	20	5	85	87	603.59	0.427264	0.0606693	0.0322971	0.00944243	0.438478	0.0318486	25.3766	0.548112	0.0738767	20.7387	21.0654
189	1170	D	20	6	85	87	605.09	0.403627	0.0637306	0.0366451	0.0100509	0.44877	0.0371762	22.9004	0.568229	0.0910313	21.8094	22.2488
189	1170	D	20	7	85	87	606.59	0.321283	0.0646182	0.0582919	0.01446	0.478988	0.0623588	7.3029	0.676471	0.21131	26.989	28.6159
189	1170	D	21	1	85	87	607.16	0.411112	0.0625182	0.0345432	0.00992508	0.450034	0.0318673	21.1798	0.549755	0.0823868	20.8276	21.162
189	1170	D	21	2	85	87	608.66	0.398112	0.0660661	0.0371514	0.00995281	0.439296	0.0494208	15.0652	0.593668	0.0904246	23.1104	23.7451	0
189	1170	D	21	5	85	87	613.16	0.400639	0.063895	0.0372145	0.010534	0.448992	0.0387256	25.5645	0.575079	0.0877193	22.1654	22.6517
189	1170	D	21	5	85	87	613.16	0.391324	0.063745	0.0368305	0.0103586	0.455954	0.0417884	9.59833	0.582609	0.0917908	22.5518	23.0946
189	1170	D	22	3	85	87	618.61	0.379021	0.060979	0.0386014	0.0114685	0.46993	0.04	35.5954	0.596296	0.0753481	23.2416	23.8998
189	1170	D	22	5	85	87	621.61	0.352466	0.0642345	0.0489994	0.0130116	0.469406	0.0518817	11.9008	0.63939	0.100024	25.3144	26.4347
189	1170	D	23	2	85	87	627.96	0.367404	0.0623893	0.0404375	0.0106293	0.477548	0.0415929	11.2995	0.597615	0.076123	23.3073	23.9774
189	1170	D	23	6	85	87	633.96	0.355366	0.0665504	0.0465206	0.012244	0.466822	0.0524973	40.3217	0.625727	0.0859059	24.6727	25.631
189	1170	D	23	6	85	87	633.96	0.349884	0.0662338	0.0467054	0.0123517	0.473563	0.051262	NA	0.62485	0.0863422	24.6311	25.5794
189	1170	D	24	2	85	87	637.66	0.347222	0.061523	0.044624	0.0115389	0.487167	0.0479246	31.774	0.628508	0.0656099	24.8044	25.7946
189	1170	D	25	4	85	87	650.16	0.313774	0.065409	0.0515057	0.0141246	0.496098	0.0590893	6.55793	0.655975	0.0709509	26.0751	27.4103
189	1170	D	26	6	85	87	662.96	0.286273	0.060661	0.0539209	0.012683	0.525438	0.0610233	5.72699	0.677829	0.0469054	27.0486	28.6958
189	1170	D	27	4	85	87	669.56	0.240727	0.0650962	0.0670297	0.0155006	0.528504	0.0831427	1.36536	0.717916	0.0670156	28.7555	31.0539
189	1170	D	28	4	85	87	678.65	0.281767	0.061004	0.0519765	0.0146355	0.527972	0.0626453	1.79298	0.679367	0.0491674	27.116	28.7863
189	1170	D	29	4	85	87	688.72	0.281044	0.060031	0.054635	0.0167952	0.526115	0.06138	1.78268	0.688702	0.0428665	27.5214	29.3354
189	1170	D	30	3	85	87	696.91	0.345549	0.0564629	0.0424218	0.0131448	0.494921	0.0475005	NA	0.646067	0.053171	25.623	26.8275
189	1170	D	30	6	66	68	701.22	0.29481	0.0614695	0.0511359	0.017096	0.525036	0.0504521	NA	0.658794	0.0237355	26.2025	27.5761	0

## Sheet: 1172_Paly
Palynological data from ODP Site 1172 (data from Bijl et al. 2009, 2010, 2011, 2013)
Sample info		Relative dinocyst abundances at ODP Site 1172 (fraction of total dinocysts)
Depth (mbsf)	Age (GTS2012) (Bijl2013 age model, same as Cramwinckel2018 for this interval)	Achomosphaera membraniphora	Achomosphaera ramulifera	Alterbidinium acutulum	Alterbidinium distinctum	Apectodinium homomorphum	Apteodinium australiense	Arachnodinium antarcticum	Areoligera Cpx. (pars)	Batiacasphaera cassicula	Batiacasphaera spp.	Brigantedinium spp.	Cerebrocysta bartonensis	Cerebrocysta spp. (pars)	Charlesdowniea coleothrypta	Cleistosphaeridium diversispinosum	Cleistosphaeridium placacanthum	Cordosphaeridium fibrospinosum	Cordosphaeridium minimum	Corrudinium regulare	Cribroperidinium spp. (pars)	Dapsilidinium spp.	Deflandrea antarctica	Deflandrea convexa	Deflandrea cygniformis	Deflandrea phosphoritica	Deflandrea sp. A cf. Brinkhuis 2003	Deflandrea spp. (pars)	Diphyes colligerum	Distatodinium paradoxum	Enneadocysta dictyostila	Enneadocysta multicornuta	Eocladopyxis spp. (pars)	Fibrocysta spp.	Gelatia inflata	Glaphyrocysta delicata	Glaphyrocysta intricata	Glaphyrocysta pastielsii	Glaphyrocysta retiintexta	Hystiocysta / Elytrocysta spp. (pars)	Hystrichokolpoma rigaudiae	Hystrichokolpoma spinosum	Hystrichokolpoma spp. (pars)	Hystrichokolpoma truncatum	Hystrichosphaeridium ?truswelliae	Hystrichosphaeridium ?tubiferum	Impagidinium dispertitum	Impagidinium maculatum	Impagidinium parvireticulatum
358.82	33.27	0	0	0	0	0	0	0	0	0	0	0.756014	0	0	0	0	0	0.00343643	0	0	0	0	0.0171821	0	0	0.00687285	0.0756014	0	0	0	0.0103093	0	0	0	0	0	0	0	0	0.00343643	0	0	0	0	0	0	0	0	0
359.05	33.95	0	0.0131579	0	0.00657895	0	0	0	0.00657895	0	0	0.322368	0	0	0	0	0.0131579	0.0131579	0	0	0	0	0.0263158	0	0	0.0197368	0.0526316	0	0	0.0131579	0.0263158	0	0	0	0	0	0	0	0	0.00657895	0.00657895	0	0	0	0	0	0	0	0
359.15	34.11	0	0	0	0.00423729	0	0	0	0	0	0	0.0508475	0	0	0	0	0.00847458	0.00423729	0.0423729	0.0127119	0	0.00847458	0.0677966	0	0	0.0169492	0.0423729	0	0	0	0.0211864	0	0	0	0	0	0	0	0	0	0.0211864	0	0	0	0	0	0	0	0
359.2	34.19	0	0	0	0.00662252	0	0	0	0.00662252	0	0	0.10596	0	0	0	0	0.0794702	0.00662252	0	0.00662252	0	0	0.0397351	0	0	0.0264901	0.0463576	0	0	0	0.0264901	0	0	0	0	0	0	0	0	0	0.0198676	0	0	0	0	0	0	0	0
359.35	34.43	0	0	0	0.00806452	0	0	0	0	0	0	0.104839	0	0	0	0	0.0967742	0	0	0.016129	0	0	0.0241935	0	0	0.016129	0.0806452	0	0	0	0.00806452	0	0	0	0	0	0	0	0	0.00806452	0.00806452	0	0	0	0	0	0.00806452	0	0
359.5	34.67	0	0.00526316	0	0.0157895	0	0	0	0	0	0	0.152632	0	0	0	0	0.0473684	0.00526316	0	0.0210526	0	0	0.0210526	0	0	0.00526316	0.105263	0	0	0	0.0105263	0	0	0	0	0	0	0	0	0.00526316	0.0368421	0	0	0	0	0	0.00526316	0	0
359.55	34.75	0	0.00729927	0	0.00729927	0	0	0	0	0	0	0.145985	0	0	0	0	0.0437956	0	0	0	0	0	0.0145985	0	0	0.00729927	0.0656934	0	0	0	0.00729927	0	0	0	0.00729927	0	0	0	0	0.00729927	0.0291971	0	0	0	0	0	0.0145985	0	0
359.75	35.065	0	0	0	0.0258065	0	0	0	0	0	0	0.0967742	0	0	0	0	0	0.00645161	0	0.0129032	0	0	0.0129032	0	0	0.0967742	0.0322581	0	0	0	0.0129032	0.00645161	0	0	0	0	0	0	0	0.00645161	0.00645161	0	0	0	0	0	0.00645161	0	0
359.95	35.3925	0	0	0	0.0625	0	0	0	0	0	0	0.0892857	0.00892857	0	0	0	0	0	0	0	0	0	0.0892857	0	0	0.0357143	0.0535714	0	0	0	0.0178571	0	0	0	0	0	0	0	0	0	0	0	0	0	0	0	0.00892857	0	0
360.44	35.7538	0	0	0	0	0	0	0	0	0	0	0	0	0	0	0	0	0	0	0	0	0	0.191176	0	0.367647	0	0	0	0	0	0.00735294	0.00735294	0	0	0	0	0	0	0	0	0	0	0	0	0	0	0.00735294	0	0
360.57	35.7744	0	0	0	0	0	0	0	0	0	0	0	0	0	0	0	0	0	0	0	0	0	0.17341	0	0.653179	0	0	0	0	0	0.00578035	0.00578035	0	0	0	0	0	0	0	0	0	0	0	0	0	0	0	0	0
360.65	35.7871	0	0	0	0	0	0	0	0	0	0.00299401	0	0	0	0	0	0	0	0	0.0149701	0	0	0.622754	0	0.290419	0	0	0	0	0	0.00299401	0	0	0	0	0	0	0	0	0	0	0	0	0	0	0	0.00299401	0	0
361.15	35.8663	0	0	0	0.0276817	0	0	0	0	0	0.00346021	0	0	0	0	0	0	0	0	0.00692042	0	0	0.460208	0	0.0795848	0	0	0	0	0	0.017301	0	0	0	0	0	0	0.00346021	0	0	0	0	0	0	0	0	0.00346021	0	0
361.45	36.01	0	0	0	0.00647249	0	0	0	0	0	0	0	0	0	0	0	0	0	0	0.00647249	0	0	0.446602	0	0.148867	0.00647249	0	0	0	0	0.00323625	0	0	0.00323625	0	0	0	0	0	0	0.00323625	0	0	0	0	0	0.00647249	0.00323625	0.00323625
361.64	36.076	0	0	0	0.00406504	0	0	0	0	0	0	0	0	0	0	0	0	0	0	0	0	0	0.0813008	0	0.186992	0	0	0	0	0	0.00406504	0	0	0	0	0	0	0	0	0	0	0	0	0	0	0	0.00406504	0	0
361.65	36.0779	0	0	0	0	0	0	0	0	0	0	0	0	0	0	0	0	0	0	0	0	0	0.248276	0	0.0275862	0	0	0	0	0	0.00689655	0.00689655	0	0	0	0	0	0	0	0	0	0	0	0	0	0	0.0103448	0	0
362.4	36.2171	0	0	0	0	0	0	0	0	0	0	0	0	0	0	0	0	0	0	0	0	0	0.387833	0	0.243346	0	0	0	0	0	0.0152091	0	0	0	0	0	0	0.00380228	0	0	0	0	0	0	0	0	0.00380228	0	0.00380228
362.65	36.2636	0	0	0	0	0	0	0	0	0	0	0	0	0	0	0	0	0	0	0.00980392	0	0	0.318627	0	0.0490196	0	0	0	0	0	0	0	0	0	0	0	0	0.00245098	0	0	0	0	0	0	0	0	0.0122549	0	0.00245098
362.74	36.2803	0	0	0	0.0045045	0	0	0	0	0	0	0	0	0	0	0	0	0	0	0.0045045	0	0	0.27027	0	0.0225225	0	0	0	0	0	0.0045045	0	0	0	0	0	0	0	0	0	0	0	0	0	0	0	0.0045045	0	0.0045045
362.95	36.3193	0	0	0	0.0141844	0	0	0	0	0	0	0	0	0	0	0	0	0	0	0	0	0	0.539007	0	0.141844	0.0070922	0	0	0	0	0.0035461	0	0	0.0035461	0	0	0	0	0	0	0	0	0	0	0	0	0.0035461	0.0070922	0.0035461
363.15	36.3564	0	0	0	0	0	0	0	0	0	0	0	0	0	0	0	0	0.00319489	0	0	0	0	0.169329	0	0.0223642	0.00319489	0	0	0	0	0.00638978	0	0	0	0	0	0	0	0	0	0	0	0	0	0.00638978	0	0.0191693	0	0.00638978
363.3	36.3843	0	0	0	0	0	0	0	0	0	0.00446429	0	0	0	0	0	0	0	0	0	0	0	0.111607	0.00892857	0.0178571	0	0	0	0	0	0.00892857	0	0	0	0	0	0	0	0	0	0	0	0	0	0.00446429	0	0.0133929	0	0
363.58	36.4363	0	0	0	0	0	0	0	0	0	0	0	0	0	0	0	0	0	0	0	0	0	0.808642	0	0.00308642	0.00308642	0	0	0	0	0	0	0	0	0	0	0	0.00308642	0	0	0	0	0	0	0	0	0.00308642	0	0
363.65	36.4493	0	0	0	0	0	0	0	0	0	0	0	0	0	0	0	0	0	0	0.00263158	0	0	0.852632	0	0	0	0	0	0	0	0.00789474	0	0	0	0	0	0	0	0	0	0	0	0	0	0	0	0	0	0
363.7	36.4586	0	0	0	0.0074813	0	0	0	0	0	0	0	0	0	0	0	0	0	0	0	0	0	0.668329	0	0	0	0	0	0	0	0.00498753	0	0	0	0	0	0	0	0	0	0.00249377	0	0	0	0	0	0.0074813	0	0
363.91	36.4976	0	0	0	0.00420168	0	0	0	0	0	0	0	0	0	0	0	0	0	0	0	0	0	0.092437	0	0	0	0	0	0	0	0.00840336	0.012605	0	0	0	0	0	0	0	0	0	0	0	0	0	0	0.00420168	0	0.00840336
364.05	36.5236	0	0	0	0	0	0	0	0	0	0	0	0	0	0	0	0	0	0	0.008	0	0	0.188	0	0	0	0	0	0	0	0.38	0.008	0	0	0	0	0	0	0	0	0	0	0	0	0	0	0	0	0.012
365.05	36.7064	0	0	0	0	0	0	0	0	0	0	0	0	0	0	0	0	0	0	0.0118577	0	0	0.209486	0	0	0	0	0.00395257	0	0	0.0474308	0.0118577	0	0.0118577	0	0	0	0	0	0	0	0	0	0	0	0	0.00790514	0	0
366.55	36.8993	0	0	0	0	0	0	0	0	0	0	0	0	0	0	0	0	0	0	0.0020202	0	0	0.0040404	0	0	0	0	0.0020202	0	0	0.565657	0	0	0	0	0	0	0	0	0	0	0	0	0	0	0	0	0	0.0020202
368.05	37.16	0	0	0	0.0263158	0	0	0	0	0	0	0	0	0	0	0	0	0	0	0.00328947	0	0	0.519737	0	0	0	0	0.00328947	0	0	0.210526	0	0	0.00328947	0	0	0	0	0	0	0	0	0	0	0	0	0.00328947	0	0
369.55	37.46	0	0	0	0	0	0	0	0	0	0	0	0	0	0	0	0	0	0	0	0	0	0.646154	0	0	0	0	0	0	0	0.284615	0	0	0	0	0	0	0	0	0	0	0	0	0	0	0.00384615	0.00769231	0	0
371.05	37.76	0	0	0	0.00403226	0	0	0	0	0	0.00403226	0	0	0	0	0	0	0	0	0.00806452	0	0	0.487903	0	0	0.0201613	0	0.00806452	0	0	0.108871	0	0	0.00806452	0	0	0	0	0	0	0	0	0	0	0	0.00403226	0.00403226	0	0
372.55	38.06	0	0	0	0	0	0	0	0	0	0	0	0.0019802	0	0	0	0	0	0	0	0	0	0.845545	0.00594059	0	0.0633663	0	0	0	0	0.0673267	0	0	0	0	0	0	0	0	0	0	0	0	0	0	0	0.0019802	0	0
373.3	38.21	0	0.00456621	0	0.00913242	0	0	0	0	0	0	0	0	0	0	0	0	0	0	0.00913242	0	0	0.374429	0.00456621	0	0	0	0	0	0	0.347032	0	0	0	0	0	0	0	0	0	0	0	0	0	0	0	0	0	0
374.65	38.3565	0	0	0	0.00483092	0	0	0	0	0	0.00483092	0	0	0	0	0	0	0	0	0	0	0	0.144928	0	0	0.0144928	0	0	0	0	0.0772947	0	0	0.0144928	0	0	0	0	0	0	0	0	0	0	0.00483092	0	0.00483092	0.0144928	0.0144928
376.15	38.4096	0	0	0	0	0	0	0	0	0	0	0	0	0	0	0	0	0	0	0.0021097	0	0	0.727848	0	0	0	0	0	0	0	0.00632911	0	0	0	0	0	0	0	0	0	0	0	0	0	0	0	0	0	0.0021097
377.65	38.4626	0	0	0	0	0	0	0	0	0	0	0	0.00342466	0	0	0	0	0	0	0.00342466	0	0	0.373288	0	0	0	0	0	0	0	0.0273973	0	0	0	0	0	0	0.00684931	0	0	0	0	0	0	0	0	0.00684931	0	0
379.15	38.5157	0	0	0	0	0	0	0	0	0.00766283	0	0	0.00383142	0	0	0	0	0	0	0.00383142	0	0	0.482759	0	0	0	0	0	0	0	0.0191571	0.0306513	0	0	0	0	0	0	0	0	0	0	0	0	0.00383142	0	0	0	0
380.51	38.5638	0	0	0	0	0	0	0	0	0	0	0	0	0	0	0	0	0	0	0.023166	0	0	0.42471	0	0	0.019305	0	0	0	0	0.023166	0.0501931	0	0.019305	0	0	0	0	0.003861	0	0.003861	0	0	0.003861	0.00772201	0	0	0	0
382.15	38.622	0	0	0	0	0	0	0	0	0	0.00367647	0	0.00735294	0	0.00367647	0	0	0	0	0.00367647	0	0	0.334559	0	0	0	0	0	0	0	0.0551471	0.128676	0	0	0	0.00367647	0	0	0	0	0	0	0	0	0	0.0110294	0.0183824	0	0.00367647
384.25	38.704	0	0	0	0	0	0	0.00395257	0	0	0.00395257	0	0.00395257	0	0	0	0	0	0.0118577	0.0474308	0	0	0.0474308	0	0	0.00395257	0	0	0	0	0.00790514	0.0118577	0	0.00790514	0	0	0	0.00395257	0	0	0	0	0	0	0.00395257	0	0.0395257	0	0
385	38.7333	0	0	0	0.00423729	0	0	0	0	0	0.00423729	0	0	0	0	0	0	0.00423729	0	0.00847458	0	0	0.029661	0	0	0	0	0	0	0	0.0127119	0.0338983	0	0	0.00423729	0	0	0	0	0	0	0	0.00423729	0	0	0.00423729	0.0127119	0	0.00423729
385.75	38.7626	0	0	0.0030581	0	0	0	0.0030581	0	0	0	0	0	0	0	0	0	0	0	0	0	0	0.0825688	0	0	0	0	0	0	0	0.0244648	0.0397554	0	0	0	0	0	0	0	0	0.0030581	0.0030581	0	0	0	0.0152905	0.0152905	0	0
387.25	38.8212	0	0	0	0	0	0	0.00881057	0	0	0	0	0	0	0	0	0	0	0	0	0	0	0.136564	0	0	0.00440529	0	0	0	0	0.0440529	0.154185	0	0.00440529	0	0	0	0.00440529	0	0	0	0	0.00881057	0	0.00881057	0.00440529	0.0220264	0.00440529	0.00881057
388.75	38.8798	0	0	0	0	0	0	0.0057971	0	0	0	0	0.00289855	0	0	0	0	0	0	0.0057971	0	0	0.257971	0	0	0	0	0	0	0	0	0.0202899	0	0	0	0	0	0	0	0	0	0.00289855	0	0.00289855	0	0	0.0144928	0	0.00289855
390.25	38.9385	0	0	0	0.0316742	0	0	0	0	0	0	0	0.0180995	0	0	0	0	0	0.00452489	0.00452489	0	0	0.339367	0	0	0.00904977	0	0	0	0	0.00452489	0	0	0	0	0	0.122172	0	0	0	0	0	0	0	0.00452489	0	0.0316742	0	0
391.75	38.9971	0	0	0	0.0117302	0	0	0.00293255	0	0	0	0	0	0	0	0	0	0	0.00293255	0.0381232	0	0	0.255132	0	0	0.00879765	0	0	0	0	0.0117302	0.217009	0	0	0	0	0	0	0	0	0	0	0	0	0.0058651	0.00293255	0.00293255	0	0
393.85	39.0791	0	0	0	0	0	0	0.0257353	0	0	0.00735294	0	0.00735294	0	0	0	0	0	0	0	0	0	0.238971	0.00367647	0	0	0	0	0	0	0	0.0294118	0	0	0	0	0	0.242647	0	0	0	0.00367647	0	0	0	0.00367647	0.00735294	0	0
394	39.085	0	0	0	0	0	0	0.00487805	0	0	0	0	0.00487805	0	0	0	0	0	0	0	0	0	0.107317	0	0	0	0	0	0	0	0	0.468293	0.102439	0	0	0	0	0.0195122	0	0	0	0	0	0	0	0	0.0146341	0	0
394.15	39.0908	0	0	0	0.0316742	0	0	0	0	0.00452489	0	0	0.00904977	0	0	0	0	0	0	0.00452489	0	0	0.113122	0	0	0	0	0	0	0	0	0.497738	0.00904977	0	0	0	0	0.00452489	0	0	0	0	0	0	0.00452489	0	0.0180995	0	0.00452489
394.83	39.1174	0	0	0	0	0	0	0.00520833	0	0	0	0	0.00520833	0	0	0	0	0	0	0	0	0	0.166667	0	0	0	0	0	0	0	0.00520833	0.03125	0	0.0520833	0	0	0	0	0	0	0	0	0	0	0	0	0.00520833	0	0.0104167
395.35	39.1377	0.00454546	0	0	0	0	0	0	0	0	0	0	0.0181818	0	0	0	0	0	0	0.00909091	0	0	0.236364	0.00454546	0	0	0	0	0	0	0.0318182	0.0363636	0	0	0	0	0	0	0	0	0.00454546	0	0	0.00454546	0.00909091	0.00454546	0.00909091	0	0
396.18	39.1702	0	0	0	0.0141509	0	0	0	0	0	0	0	0	0	0	0	0	0	0	0	0	0	0.188679	0	0	0	0	0	0	0	0.00471698	0.0188679	0	0	0	0	0	0	0	0	0	0	0	0	0	0	0.00471698	0	0
396.85	39.1963	0	0	0	0.00330033	0	0	0.00330033	0	0	0	0	0	0	0	0	0	0	0	0.00990099	0	0	0.287129	0	0	0	0	0	0	0	0.00330033	0.0165016	0.00330033	0	0	0	0	0	0	0	0	0	0	0	0	0	0.0132013	0	0
397.25	39.212	0	0	0	0	0	0	0.00869565	0	0	0.00434783	0	0	0	0	0	0	0	0	0.00434783	0	0	0.456522	0	0	0	0	0	0	0	0	0.0217391	0	0	0	0	0	0	0	0	0	0	0	0	0	0.00434783	0.0130435	0	0
397.85	39.2354	0	0	0	0.00925926	0	0	0	0	0	0	0	0.00925926	0	0	0	0	0	0	0.00462963	0	0	0.208333	0	0	0	0	0	0	0	0.0231481	0.00925926	0	0	0	0	0	0	0	0	0	0	0	0	0	0	0.0416667	0	0
398.35	39.255	0.00444444	0	0	0.00888889	0	0	0.00444444	0	0	0	0	0.0177778	0	0	0	0	0	0	0.00444444	0	0	0.324444	0	0	0	0	0	0	0	0	0.00444444	0	0	0	0	0	0	0	0	0	0	0	0	0	0.00444444	0.0133333	0	0
399.85	39.3136	0	0	0	0.0284553	0	0	0.00813008	0	0	0	0	0	0	0	0	0	0	0	0	0	0	0.353659	0	0	0	0	0	0	0	0.00406504	0.0203252	0	0	0	0	0	0	0	0	0	0	0	0	0	0	0.00813008	0	0.00406504
401.35	39.3722	0	0	0	0.027451	0	0	0.0470588	0	0	0.00784314	0	0.00392157	0	0	0	0	0	0	0	0	0	0.270588	0	0	0	0	0	0	0	0	0.0784314	0	0	0	0	0	0.00784314	0	0	0	0	0	0.00392157	0	0	0.0117647	0	0.00392157
403.45	39.4542	0.00638978	0	0.00319489	0.00958466	0	0	0.00638978	0.057508	0	0	0	0	0	0	0	0	0.0319489	0	0.00319489	0	0	0.319489	0	0.159744	0	0	0	0	0	0.057508	0.00319489	0	0	0	0	0	0	0	0	0	0	0	0	0	0.00638978	0.0159744	0	0.00319489
404.95	39.5129	0	0.00381679	0	0.0114504	0	0	0.0152672	0	0	0	0	0.00381679	0	0	0	0	0.00381679	0	0	0	0	0.259542	0	0	0	0	0	0	0	0.00763359	0.0305344	0	0	0	0	0	0.0152672	0	0	0	0	0	0	0	0	0.00381679	0.00381679	0
406.45	39.5715	0.00584795	0	0	0.00292398	0	0	0.00292398	0	0	0.00584795	0	0	0	0	0	0	0	0	0	0	0	0.28655	0.00292398	0	0	0	0	0	0	0	0.184211	0	0	0	0	0	0	0	0	0.00292398	0	0	0	0	0.00292398	0	0.00292398	0
407.95	39.6301	0	0	0	0	0	0	0.00222717	0	0.00222717	0	0	0.00445434	0	0	0	0	0	0	0	0	0	0.100223	0	0	0	0	0	0.00222717	0	0	0.670379	0	0	0	0	0	0	0	0	0	0	0	0	0	0	0	0	0
409.45	39.6887	0.00719425	0	0	0.00719425	0	0	0.00359712	0	0	0	0	0.0107914	0	0	0	0	0	0	0	0	0	0.136691	0	0	0	0	0	0	0	0.00359712	0.345324	0	0	0	0	0	0	0	0	0	0	0	0	0	0.00359712	0.00359712	0.00359712	0.00359712
410.95	39.7473	0	0	0	0	0	0	0	0	0	0	0	0.00184162	0	0	0	0	0	0	0	0	0	0.241252	0	0	0.00184162	0	0	0	0	0.0128913	0.685083	0	0	0	0	0	0	0	0	0.00184162	0	0	0	0	0	0	0	0.00184162
411.7	39.7766	0	0	0	0	0	0	0	0	0	0	0	0	0	0	0	0	0	0	0	0	0	0.564394	0.00378788	0	0	0	0	0	0	0	0.030303	0	0	0	0	0	0	0	0	0	0	0	0	0	0	0	0	0.00378788
413.05	39.8294	0	0.00393701	0	0.00787402	0	0.00393701	0.011811	0	0	0	0	0.00393701	0	0	0	0	0	0	0	0	0	0.311024	0	0	0	0	0	0	0	0.00393701	0.0590551	0	0	0	0	0	0	0	0	0	0	0	0	0	0.00787402	0.0314961	0	0.00787402
414.55	39.888	0	0	0	0	0	0	0	0	0	0	0	0	0	0	0	0	0	0	0	0	0	0.0718816	0	0	0	0	0	0	0	0.00211416	0.896406	0	0	0	0	0	0	0	0	0	0	0	0	0	0	0	0	0.00211416
417.55	40.0052	0	0	0	0	0	0	0.00436681	0	0.00873362	0	0	0	0	0	0.00436681	0	0	0	0	0	0	0.227074	0	0	0	0	0	0	0	0.00873362	0.235808	0	0	0	0	0	0	0	0	0.00436681	0	0	0	0	0	0.00873362	0	0
419.05	40.0638	0.00961539	0	0	0	0	0	0.00480769	0	0	0.0384615	0	0.00480769	0	0	0	0	0.00480769	0	0	0	0	0.298077	0	0	0	0	0	0	0	0.0576923	0.230769	0	0	0	0	0	0	0	0	0	0	0	0	0.0144231	0	0.00480769	0	0
420.55	40.1224	0	0	0	0	0	0	0	0	0	0.0136986	0	0.00456621	0	0	0	0	0.00913242	0.00456621	0	0	0	0.219178	0	0	0.00456621	0	0	0	0	0.0319635	0.022831	0	0	0	0	0	0	0	0	0	0	0	0	0.242009	0	0.00456621	0.00456621	0.00456621
422.65	40.3252	0	0	0	0	0	0	0.028169	0	0	0.0187793	0	0	0	0	0	0	0	0	0	0	0	0.422535	0	0	0	0	0	0	0	0.0657277	0.0375587	0	0	0	0	0	0	0	0	0	0	0	0	0.00469484	0	0.0422535	0	0.00469484
424.15	40.4935	0	0	0	0.0049505	0	0	0	0	0	0.0049505	0	0	0	0	0	0	0	0	0	0	0	0.262376	0	0	0	0	0	0	0	0.019802	0.029703	0	0	0	0	0	0	0	0	0.0049505	0	0	0.0049505	0	0.0049505	0.039604	0.0148515	0
425.65	40.6618	0.00434783	0	0	0	0	0	0.00434783	0	0	0.00434783	0	0.00434783	0	0	0	0	0.00434783	0	0	0	0	0.130435	0	0	0	0	0	0	0	0.547826	0.108696	0	0	0	0	0	0	0	0	0	0	0	0	0	0	0.00434783	0	0
427.15	40.8302	0	0	0	0.00413223	0.00413223	0	0	0	0	0.00413223	0	0.00413223	0	0	0	0	0	0	0	0	0	0.194215	0	0	0	0	0	0	0	0.00826446	0.0289256	0	0	0	0	0	0	0	0	0	0	0	0	0	0.0123967	0.0289256	0.00826446	0.00413223
427.9	40.9143	0	0	0	0	0.0034965	0	0.0104895	0	0	0	0	0.013986	0	0	0.0034965	0	0	0	0	0	0	0.440559	0	0	0	0	0	0	0	0.0174825	0.00699301	0.0034965	0	0.0034965	0	0	0	0	0	0	0	0	0	0.0034965	0.0104895	0.0104895	0	0.0034965
428.65	40.9985	0	0	0	0	0	0	0.003663	0	0	0	0	0.010989	0	0	0	0	0.003663	0	0	0	0	0.362637	0	0	0	0	0	0	0	0.0659341	0	0	0	0	0	0	0	0	0	0	0	0	0.003663	0.025641	0	0.00732601	0	0.00732601
430.15	41.168	0	0.00423729	0	0.0211864	0	0	0.00423729	0	0	0	0	0.00847458	0	0	0.00423729	0	0	0	0	0.00423729	0	0.338983	0	0	0	0	0	0	0	0.0211864	0.101695	0	0	0	0	0	0	0	0	0	0	0	0	0.00423729	0.00423729	0.00847458	0	0.00847458
432.25	41.409	0	0	0	0	0	0	0	0	0	0	0	0.00416667	0	0	0	0	0	0.00833333	0	0	0	0.55	0	0	0	0	0	0	0	0.0708333	0	0	0	0	0	0	0	0	0	0	0	0	0	0	0	0.0125	0	0.00833333
433.75	41.5227	0	0	0	0	0	0	0	0	0	0	0	0.00371747	0	0	0.00743494	0	0	0	0	0	0	0.550186	0	0	0	0	0	0	0	0.0185874	0.141264	0.00743494	0	0	0	0	0	0	0	0	0	0	0	0	0.00371747	0.0111524	0	0
435.25	41.6365	0	0	0	0	0	0	0.00408163	0	0	0.00816326	0	0.00408163	0	0	0	0	0	0	0	0	0	0.363265	0	0	0	0	0	0	0	0.334694	0	0	0	0	0	0	0	0	0	0	0	0	0	0	0	0.00816326	0	0.00408163
436.75	41.7502	0	0	0	0	0	0	0.00293255	0	0	0.00293255	0	0.00293255	0	0	0	0	0	0	0	0	0	0.0322581	0	0	0	0	0	0	0	0.0117302	0.741935	0	0	0	0	0	0	0	0	0	0	0	0	0	0	0.0058651	0	0.0058651
438.23	41.8624	0	0	0	0	0	0	0.00338983	0	0	0.00338983	0	0.0135593	0	0	0	0	0	0	0	0	0	0.0915254	0	0	0.00338983	0	0	0	0	0.620339	0	0	0	0	0	0	0	0	0	0	0	0	0	0	0	0.00677966	0	0
439.75	41.9777	0	0	0	0	0	0	0.00338983	0	0	0.00338983	0	0.00338983	0	0	0	0	0.00338983	0	0	0	0	0.176271	0	0	0	0	0	0	0	0.545763	0	0	0	0	0	0	0	0	0	0	0	0	0	0.00338983	0	0.00677966	0	0.00677966
441.85	42.137	0	0	0	0.00740741	0	0	0.00740741	0	0	0	0	0	0	0	0	0	0	0	0	0	0	0.307407	0	0	0	0	0	0	0	0.211111	0.214815	0	0	0	0	0	0	0	0	0	0	0.00740741	0	0	0	0	0	0.0037037
443.35	42.2507	0	0	0	0	0	0	0	0	0	0	0	0	0	0	0	0	0	0	0	0	0	0.541026	0	0	0	0	0	0	0	0.364103	0	0	0	0	0	0	0	0	0	0	0	0	0	0	0	0	0	0.0025641
444.85	42.38	0	0	0	0.0194805	0	0	0.00324675	0	0	0	0	0.00324675	0	0	0	0	0	0	0	0	0	0.636364	0.00324675	0	0	0	0	0	0	0.107143	0.0551948	0	0	0	0	0	0	0	0	0	0	0	0	0.00324675	0	0.00974026	0	0.00324675
446.35	42.5213	0	0	0	0	0	0	0.0106383	0	0	0	0	0	0	0	0	0	0	0	0	0	0	0.755319	0	0	0	0	0	0	0	0.154255	0	0	0	0	0	0	0	0	0	0	0	0	0	0	0	0.00531915	0	0
447.85	42.6625	0	0	0	0	0	0	0.00701754	0	0	0	0	0.00350877	0	0	0	0	0	0	0	0	0	0.315789	0	0	0	0	0	0	0	0.624561	0	0.00350877	0	0	0	0	0	0	0	0	0	0	0	0	0	0.00350877	0	0.00350877
449.35	42.8038	0	0	0	0	0	0	0.002331	0	0	0.002331	0	0	0	0	0	0	0	0	0	0	0	0.37296	0	0	0	0	0	0	0	0.585082	0	0.00466201	0	0	0	0	0	0	0	0	0	0	0	0	0	0	0.002331	0.002331
451.45	43.0015	0	0	0	0	0	0	0.0466667	0	0	0	0	0.00333333	0	0	0	0	0.00333333	0	0	0	0	0.343333	0	0	0	0	0	0	0	0.386667	0	0	0	0	0	0	0	0	0	0	0	0	0.00333333	0	0	0.01	0.00333333	0
452.95	43.1428	0	0	0	0	0	0	0.0886427	0	0	0	0	0	0	0	0	0	0.00831025	0	0	0	0	0.542936	0	0	0	0	0	0	0	0.207756	0	0	0	0	0	0	0	0	0	0	0	0	0	0.00554017	0	0.00277008	0.00554017	0.00831025
454.45	43.284	0	0	0	0	0	0	0.0117188	0	0	0	0	0.0195312	0	0	0	0	0	0	0	0	0	0.441406	0	0	0	0	0	0	0	0.078125	0	0.0078125	0	0	0	0	0	0	0	0	0	0	0	0	0	0.0117188	0.00390625	0.00390625
455.95	43.4253	0	0	0	0	0	0	0	0	0	0.00421941	0	0.0126582	0	0	0	0	0.00421941	0	0	0	0	0.447257	0	0	0	0	0	0	0	0.0168776	0.0253165	0.00421941	0	0	0	0	0	0	0	0	0	0	0	0	0	0.0126582	0	0
457.45	43.4774	0	0	0	0.00909091	0	0	0	0	0	0	0	0	0	0	0	0	0	0	0	0	0	0.5	0	0	0	0	0	0	0	0.0136364	0	0	0	0	0	0	0	0	0	0	0	0	0	0	0.00454546	0.0136364	0.00454546	0
458.95	43.5264	0	0	0	0.00387597	0	0	0.00387597	0	0	0	0	0.00775194	0	0	0	0	0	0	0	0	0	0.562016	0	0	0	0	0	0	0	0.120155	0.174419	0.00775194	0	0	0	0	0	0	0	0	0	0	0	0	0	0.00775194	0.00387597	0.00387597
470.61	43.9073	0	0	0	0	0	0	0.00406504	0	0	0	0	0.00813008	0	0	0	0	0.0203252	0	0	0	0	0.560976	0	0	0	0	0	0	0	0.207317	0	0.0650407	0	0	0	0	0	0	0	0	0	0	0	0	0	0.00813008	0.00406504	0.00406504
472.15	43.9576	0	0	0	0.0585586	0	0	0.0045045	0	0	0	0	0.0045045	0.0045045	0	0	0	0.0045045	0	0	0	0	0.576577	0	0	0	0	0	0	0	0.0540541	0.0315315	0.0045045	0	0	0	0	0	0	0	0	0	0	0	0	0	0.027027	0.0045045	0.0045045
473.65	44.0066	0	0	0	0.00925926	0	0	0	0	0	0	0	0.0138889	0	0	0	0	0	0	0	0	0	0.587963	0	0	0	0	0	0	0	0.180556	0	0	0	0	0	0	0	0	0	0	0	0	0	0	0	0.00462963	0.00462963	0.00462963
475.15	44.0556	0	0	0.00359712	0.00719425	0	0	0	0	0	0	0	0.00359712	0	0	0	0	0	0	0.00359712	0	0	0.827338	0	0	0	0	0	0	0	0.0179856	0.0179856	0.00359712	0	0	0	0	0	0	0	0	0	0	0	0	0	0.00359712	0	0
480.25	44.2223	0	0	0	0.040724	0	0	0.00452489	0	0	0.00904977	0	0.0316742	0	0	0	0	0.0180995	0	0	0	0	0.393665	0	0	0	0	0	0	0	0.171946	0.0678733	0	0	0	0	0	0	0	0	0	0	0	0	0	0.0135747	0.00904977	0	0
481.75	44.2713	0	0	0	0	0	0	0	0	0	0	0	0.0107914	0	0	0	0	0	0	0	0	0	0.758993	0	0	0	0	0	0	0	0.0179856	0	0.00359712	0	0	0	0	0	0	0	0	0	0	0	0	0	0.00359712	0	0
483.25	44.3203	0	0	0	0	0	0	0	0	0	0	0	0.00772201	0	0	0	0	0.00772201	0	0	0	0	0.737452	0	0	0	0	0	0	0	0.046332	0	0	0	0	0	0	0	0	0	0	0	0	0	0	0.003861	0	0	0
484.75	44.3693	0	0	0	0	0	0	0	0	0	0	0	0.00701754	0	0	0	0	0	0	0	0	0	0.775439	0	0	0	0	0	0	0	0.00701754	0	0.00350877	0	0	0	0	0	0	0	0	0	0	0	0	0	0.00701754	0	0
486.25	44.4183	0	0	0	0	0	0	0.00401606	0	0	0.0120482	0	0.0120482	0	0	0	0	0	0	0	0	0	0.823293	0	0	0	0	0	0	0	0	0	0	0	0	0	0	0	0	0	0	0	0	0	0	0	0.00803213	0	0
487.75	44.4673	0.00769231	0	0	0	0	0	0	0	0	0.00769231	0	0	0	0	0.00384615	0	0	0	0	0	0	0.773077	0	0	0	0	0	0	0	0	0	0.00384615	0	0	0	0	0	0	0	0	0	0	0	0	0	0.0115385	0	0
489.85	44.5359	0	0	0	0	0	0	0	0	0	0	0	0.00387597	0	0	0	0	0.00387597	0	0	0	0	0.383721	0	0	0	0	0	0	0	0.0348837	0	0.00387597	0	0	0	0	0	0	0	0	0	0	0	0	0.0116279	0.00387597	0.00387597	0
491.35	44.5849	0	0	0	0	0	0	0	0	0	0.00689655	0	0.00344828	0	0	0	0	0	0	0	0	0	0.796552	0	0	0	0	0	0	0	0.00344828	0	0.00344828	0	0	0	0	0	0	0	0	0	0	0	0	0.00344828	0	0	0
492.85	44.6339	0	0	0	0	0	0	0	0	0	0.00369004	0	0.00738007	0	0	0	0	0	0	0	0	0	0.800738	0	0	0	0	0	0	0	0.00369004	0	0	0	0	0	0	0	0	0	0	0	0	0	0	0.0110701	0	0	0
494.35	44.6829	0	0	0	0	0	0	0	0	0	0	0	0	0	0	0	0	0	0	0	0	0	0.457565	0	0	0	0	0	0	0	0.0110701	0	0	0	0	0	0	0	0	0	0	0	0	0	0	0.0258303	0	0	0
495.85	44.7319	0	0	0	0	0	0	0	0	0	0.00392157	0	0.00392157	0	0	0	0	0	0	0	0	0	0.239216	0	0	0	0	0	0	0	0.00784314	0.00392157	0.00784314	0	0	0	0	0	0	0	0.00392157	0	0	0.00784314	0	0.00392157	0.00392157	0	0
497.35	44.7809	0	0	0	0	0	0	0.00314465	0	0	0.00314465	0	0.00314465	0	0	0	0	0.00314465	0	0	0	0	0.22956	0	0	0	0	0	0	0	0.00943396	0	0.00314465	0	0	0	0	0	0	0.00314465	0	0	0	0	0	0.00943396	0	0	0
498.7	44.825	0	0	0	0	0	0	0	0	0	0	0	0	0	0	0	0	0.00316456	0	0	0	0	0.446203	0.00316456	0	0	0	0	0	0	0.123418	0	0.00316456	0	0	0	0	0	0	0	0	0	0.00632911	0	0	0	0	0	0
499.45	44.8495	0	0	0	0	0	0	0	0	0	0	0	0.00757576	0	0	0	0	0	0	0	0	0	0.255051	0	0	0	0	0	0	0	0.0126263	0	0.00505051	0	0	0	0	0	0	0	0	0	0	0	0.00252525	0	0	0	0
500.95	44.8985	0	0	0	0.00315457	0	0	0.00315457	0	0	0	0	0.00315457	0	0	0	0	0.00315457	0	0.00315457	0	0	0.14511	0	0	0	0	0	0	0	0.646688	0	0.00315457	0	0	0	0	0	0	0	0.00315457	0	0	0	0	0	0.00315457	0	0
502.45	44.9475	0	0	0	0.00299401	0	0	0	0	0	0	0	0.00598802	0	0	0.00299401	0	0.00299401	0	0	0	0	0.284431	0	0	0	0	0	0	0	0.0988024	0	0.00299401	0	0	0	0	0	0	0.00299401	0	0	0	0.00299401	0	0	0	0	0
503.95	44.9965	0	0	0	0.012931	0	0	0	0	0	0	0	0.00431035	0	0	0.00431035	0	0.00431035	0	0.00431035	0	0	0.172414	0	0	0	0	0	0	0	0.0474138	0	0.00431035	0	0	0	0	0	0	0.00431035	0	0	0	0	0	0	0	0	0
[truncated: 43 more columns]

## Sheet: Latrobe_Paly
Palynological data from the Latrobe-1 borehole (this study)
Sample info			Relative palynomorph abundances at Latrobe-1 borehole (fraction of total palynomorphs)								Relative dinocyst abundances at Latrobe-1 borehole (fraction of total dinocysts)
Sample code	Depth (m)	Rough age	Dinocyst	Spore	Trilete spore	(Bi)saccate pollen	Non-saccate pollen	Tetrad	Acritarch	Prasinophyte	Achilleodinium biformoides	Achomosphaera spp. (pars)	Adnatosphaeridium spp.	Areoligera Cpx. (pars)	Batiacasphaera spp.	Cleistosphaeridium spp. (pars)	Cordosphaeridium Cpx. (pars)	Cordosphaeridium fibrospinosum	Corrudinium incompositum	Corrudinium spp. (pars)	Dapsilidinium spp.	Deflandrea phosphoritica	Deflandrea spp. (pars)	Diphyes spp. (pars)	Distatodinium ellipticum	Distatodinium paradoxum	Dracodinium rhomboideum	Enneadocysta multicornuta	Enneadocysta pectiniformis	Enneadocysta spp. (pars)	Enneadocysta-Oligosphaeridum intermediate	Eocladopyxis spp. (pars)	Hemiplacophora semilunifera	Heteraulacacysta spp.	Homotryblium tasmanites	Hystiocysta / Elytrocysta spp. (pars)	Hystrichokolpoma spp. (pars)	Hystrichosphaeridium tubiferum	Impagidinium spp. (pars)	Kallosphaeridium spp.	Lejeunecysta spp. (pars)	Lingulodinium spp. (pars)	Melitasphaeridium pseudorecurvatum	Operculodinium spp. (pars)	Pentadinium spp.	Phthanoperidinium comatum	Phthanoperidinium spp. (pars)	Senegalinium spp. (pars)	Spiniferites pseudofurcatus-type
L84	61.46	Middle Eocene	0.128205	0.025641	0.188034	0.34188	0.299145	0.00854701	0.002849	0.00569801	0	0.0222222	0	0	0.0222222	0.0444444	0	0	0	0.0666667	0	0	0.0222222	0	0	0	0	0	0.0222222	0.0888889	0	0.0222222	0	0	0	0.0444444	0	0.0222222	0.0222222	0.0222222	0	0	0	0	0	0	0	0	0.0222222
L85	63.82	Middle Eocene	0.1133	0	0.0985222	0.394089	0.351865	0.0422238	0	0	0	0	0	0	0.0196078	0.0294118	0.00980392	0.00980392	0	0	0.0196078	0.0294118	0.0196078	0.0196078	0.00980392	0.0294118	0.00980392	0.0882353	0.0196078	0.0490196	0.0882353	0.00980392	0	0.0196078	0	0.0196078	0.00980392	0.0196078	0	0.00980392	0	0.00980392	0	0.0294118	0	0	0.0196078	0	0
L86	67.35	Middle Eocene	NA	NA	NA	NA	NA	NA	NA	NA	0	0.0333333	0.0222222	0	0.0111111	0	0.0222222	0	0	0	0.0111111	0.0555556	0.0666667	0	0	0	0.0333333	0.211111	0	0.0555556	0	0	0.0111111	0	0	0.0222222	0	0.0222222	0	0	0	0	0	0.0111111	0	0.0111111	0.0222222	0.0222222	0.0111111
L87	70.32	Middle Eocene	0.164093	0	0.131499	0.119545	0.56186	0.00153358	0.00306716	0.0184029	0.00934579	0.00934579	0	0.0186916	0.00934579	0.0280374	0.00934579	0	0.0186916	0	0	0.00934579	0.046729	0.00934579	0.00934579	0.0186916	0	0.0747664	0.00934579	0.0186916	0.0186916	0.00934579	0	0.0373832	0	0.0186916	0.0186916	0.00934579	0.0280374	0	0.0186916	0.0280374	0.00934579	0	0.00934579	0.0280374	0.046729	0	0.0186916
L88	78.98	Early Eocene																																	P
L89	86.3	Early Eocene																																	P
L90	91.82	Early Eocene																																	P
L91	96.34	Early Eocene																																	P
Sample info			Estimated absolute palynomorph abundances at Latrobe-1 borehole (number of palynomorphs per gram dry weight sediment)								Estimated absolute dinocyst abundances at Latrobe-1 borehole (number of dinocysts per gram dry weight sediment)
Sample code	Depth (m)	Rough age	Dinocyst	Spore	Trilete spore	(Bi)saccate pollen	Non-saccate pollen	Tetrad	Acritarch	Prasinophyte	Achilleodinium biformoides	Achomosphaera spp. (pars)	Adnatosphaeridium spp.	Areoligera Cpx. (pars)	Batiacasphaera spp.	Cleistosphaeridium spp. (pars)	Cordosphaeridium Cpx. (pars)	Cordosphaeridium fibrospinosum	Corrudinium incompositum	Corrudinium spp. (pars)	Dapsilidinium spp.	Deflandrea phosphoritica	Deflandrea spp. (pars)	Diphyes spp. (pars)	Distatodinium ellipticum	Distatodinium paradoxum	Dracodinium rhomboideum	Enneadocysta multicornuta	Enneadocysta pectiniformis	Enneadocysta spp. (pars)	Enneadocysta-Oligosphaeridum intermediate	Eocladopyxis spp. (pars)	Hemiplacophora semilunifera	Heteraulacacysta spp.	Homotryblium tasmanites	Hystiocysta / Elytrocysta spp. (pars)	Hystrichokolpoma spp. (pars)	Hystrichosphaeridium tubiferum	Impagidinium spp. (pars)	Kallosphaeridium spp.	Lejeunecysta spp. (pars)	Lingulodinium spp. (pars)	Melitasphaeridium pseudorecurvatum	Operculodinium spp. (pars)	Pentadinium spp.	Phthanoperidinium comatum	Phthanoperidinium spp. (pars)	Senegalinium spp. (pars)	Spiniferites pseudofurcatus-type
L84	61.46	Middle Eocene	371.769	74.3538	545.262	991.385	867.462	24.7846	8.26154	16.5231	0	8.26154	0	0	8.26154	16.5231	0	0	0	24.7846	0	0	8.26154	0	0	0	0	0	8.26154	33.0462	0	8.26154	0	0	0	16.5231	0	8.26154	8.26154	8.26154	0	0	0	0	0	0	0	0	8.26154
L85	63.82	Middle Eocene	555.795	0	483.3	1933.2	1726.07	207.129	0	0	0	0	0	0	10.8979	16.3469	5.44897	5.44897	0	0	10.8979	16.3469	10.8979	10.8979	5.44897	16.3469	5.44897	49.0407	10.8979	27.2449	49.0407	5.44897	0	10.8979	0	10.8979	5.44897	10.8979	0	5.44897	0	5.44897	0	16.3469	0	0	10.8979	0	0
L86	67.35	Middle Eocene	NA	NA	NA	NA	NA	NA	NA	NA	NA	NA	NA	NA	NA	NA	NA	NA	NA	NA	NA	NA	NA	NA	NA	NA	NA	NA	NA	NA	NA	NA	NA	NA	NA	NA	NA	NA	NA	NA	NA	NA	NA	NA	NA	NA	NA	NA	NA
L87	70.32	Middle Eocene	603.092	0	483.3	439.364	2065.01	5.63638	11.2728	67.6365	5.63638	5.63638	0	11.2728	5.63638	16.9091	5.63638	0	11.2728	0	0	5.63638	28.1819	5.63638	5.63638	11.2728	0	45.091	5.63638	11.2728	11.2728	5.63638	0	22.5455	0	11.2728	11.2728	5.63638	16.9091	0	11.2728	16.9091	5.63638	0	5.63638	16.9091	28.1819	0	11.2728
L88	78.98	Early Eocene
L89	86.3	Early Eocene
L90	91.82	Early Eocene
L91	96.34	Early Eocene
[truncated: 22 more columns]

## Sheet: Hampden_Paly
Palynological data from the Hampden section (this study)
Sample info		Relative palynomorph abundances at Hampden section (fraction of total palynomorphs)							Relative dinocyst abundances at Latrobe-1 borehole (fraction of total dinocysts)
stratigraphic height (m)	Sample code	dinocysts	Nothofagus pollen	bisaccate pollen	other pollen	spores	acritarchs	prasinophytes	Achomosphaera spp. (pars)	Alisocysta circumtabulata	Batiacasphaera cassicula	Cerebrocysta waipawaensis	Cleistosphaeridium spp. (pars)	Cordosphaeridium fibrospinosum	Cribroperidinium tenuitabulatum	Danea crassimurata	Dapsilidinium spp.	Deflandrea antarctica	Diphyes colligerum	Elytrocysta brevis	Enneadocysta dictyostila	Eocladopyxis spp. (pars)	Fibrocysta spp.	Glaphyrocysta delicata	Heteraulacacysta spp.	Hystiocysta / Elytrocysta spp. (pars)	Hystrichokolpoma rigaudiae	Hystrichosphaeridium tubiferum	Impagidinium dispertitum	Impagidinium maculatum	Lejeunecysta spp. (pars)	Melitasphaeridium pseudorecurvatum	Octodinium askinae	Operculodinium spp. (pars)	Paucispaeridium spp.	Phthanoperidinium stockmansii	Polysphaeridium spp.	Pyxidinopsis delicata	Rhombodinium rhomboideum	Samlandia septata	Senegalinium spp. (pars)	Spinidinium macmurdoense	Spinidinium schellenbergii	Spiniferites spp. (pars)	Stoveracysta spp. (pars)	Vozzhennikovia apertura	Wilsonidium echinosuturatum
5.2	CB05HB098	0.544304	0.0421941	0.0379747	0.189873	0.113924	0.0506329	0.021097	0.00775194	0	0	0.0155039	0	0.0155039	0	0	0.0620155	0.0387597	0.00775194	0.193798	0	0	0.00775194	0	0	0.00775194	0.00775194	0.116279	0.0232558	0.0155039	0	0	0	0	0	0.00775194	0	0.0232558	0.00775194	0	0.0620155	0	0	0.372093	0	0.00775194	0
5.1	CB05HB096	0.59009	0.045045	0.00900901	0.171171	0.0990991	0.0810811	0.0045045	0.0458015	0	0	0.0458015	0	0.0229008	0	0	0.0152672	0.0458015	0	0.129771	0	0	0.00763359	0	0	0.00763359	0.00763359	0.129771	0.0152672	0.00763359	0	0	0	0	0.00763359	0	0	0.0229008	0	0	0.0687023	0	0	0.419847	0	0	0
5	CB05HB094	0.551282	0.0384615	0.025641	0.17094	0.111111	0.0811966	0.0213675	0.0155039	0	0	0	0	0.0232558	0.00775194	0	0.0465116	0.0387597	0	0.147287	0.00775194	0	0.0155039	0	0	0.0155039	0.0232558	0.0775194	0.0232558	0	0	0	0	0	0	0.0232558	0	0.0155039	0	0	0.0542636	0	0	0.465116	0	0	0
4.9	CB05HB092	0.704348	0.0217391	0.00434783	0.13913	0.0869565	0.0304348	0.0130435	0.0308642	0	0	0	0	0.0123457	0	0	0.0493827	0.0493827	0	0.154321	0	0	0.0185185	0	0	0.0246914	0.0123457	0.0617284	0.0185185	0.0123457	0	0	0	0	0	0.00617284	0	0.00617284	0	0.00617284	0.037037	0	0	0.493827	0	0.00617284	0
4.8	CB05HB090	0.723618	0.0351759	0.0201005	0.0703518	0.0753769	0.0603015	0.0150754	0.0138889	0	0	0.0138889	0	0.0208333	0.00694444	0	0.0555556	0.0347222	0	0.215278	0	0	0	0	0	0.0347222	0.00694444	0.0625	0.0208333	0.0138889	0.00694444	0	0	0	0	0	0.00694444	0.00694444	0	0	0.0902778	0	0	0.381944	0	0.00694444	0
4.7	CB05HB088	0.698347	0.0661157	0.0247934	0.0909091	0.0371901	0.0619835	0.0206612	0.0118343	0	0	0.0118343	0	0.035503	0.00591716	0	0.0473373	0.035503	0	0.147929	0.0118343	0	0.0177515	0	0.00591716	0.0118343	0.0118343	0.0591716	0.0177515	0	0	0	0.0118343	0	0.0295858	0.00591716	0.0118343	0.0118343	0	0	0.0414201	0.00591716	0	0.443787	0	0	0.00591716
4.6	CB05HB086	0.578947	0.0219298	0.0175439	0.179825	0.109649	0.0789474	0.0131579	0.00757576	0	0	0.00757576	0	0.0151515	0.00757576	0	0.0984848	0.0151515	0	0.106061	0.0151515	0	0.00757576	0	0	0.0227273	0.00757576	0.0833333	0.0151515	0.0151515	0	0	0	0	0.0227273	0.00757576	0	0.00757576	0	0.00757576	0.0909091	0	0	0.431818	0	0	0.00757576
4.5	CB05HB084	0.581818	0.0227273	0.00454545	0.177273	0.15	0.05	0.0136364	0.015625	0	0	0.015625	0	0.0390625	0.015625	0	0.078125	0.015625	0	0.195312	0.046875	0	0.015625	0.0078125	0	0.0078125	0.0234375	0.0546875	0.015625	0	0	0	0	0	0.015625	0.015625	0	0.0078125	0	0	0.046875	0	0	0.359375	0	0	0.0078125
4.4	CB05HB082	0.618026	0.0171674	0.0257511	0.167382	0.0772532	0.0815451	0.0128755	0.0208333	0	0	0.00694444	0	0.0555556	0.0347222	0	0.0416667	0.00694444	0	0.222222	0.0625	0	0.00694444	0	0.0138889	0.0486111	0.0277778	0.0486111	0.0208333	0	0	0	0.00694444	0	0.0138889	0.0138889	0.0138889	0.0208333	0	0	0.0347222	0	0	0.270833	0	0.00694444	0
4.3	CB05HB080	0.688995	0.0143541	0.0239234	0.076555	0.0382775	0.157895	0	0.0138889	0.00694444	0	0	0	0.0138889	0.0277778	0	0.0347222	0.0138889	0	0.0486111	0.0694444	0	0	0	0.00694444	0.0416667	0.0625	0.111111	0.0138889	0.0138889	0	0	0.00694444	0	0	0	0.00694444	0.0277778	0	0.00694444	0.0625	0.00694444	0	0.388889	0	0	0.0138889
4.2	CB05HB078	0.786458	0.0364583	0.015625	0.0729167	0.0208333	0.0677083	0	0.0397351	0	0.00662252	0.0198675	0	0.0529801	0.00662252	0	0.0860927	0.0264901	0	0.205298	0.00662252	0	0.0264901	0	0	0.0331126	0.0264901	0.0993377	0.0198675	0.0198675	0	0	0	0	0	0.00662252	0	0.00662252	0	0	0.00662252	0	0	0.284768	0	0	0.0198675
4.1	CB05HB076	0.778894	0.0150754	0.0251256	0.0854271	0.0301508	0.0653266	0	0.0322581	0	0.00645161	0.0193548	0	0.0774194	0.0580645	0	0.0322581	0.0322581	0	0.154839	0.0129032	0	0.0129032	0	0	0.0516129	0.0387097	0.116129	0.0322581	0.0193548	0	0	0	0	0	0	0.0129032	0.00645161	0	0	0	0	0	0.245161	0	0	0.0387097
3.95	CB05HB073	0.831683	0.039604	0.0049505	0.0594059	0.049505	0.0148515	0	0.00595238	0	0	0	0	0.077381	0.047619	0	0.0357143	0.0178571	0	0.136905	0.00595238	0	0.00595238	0	0.00595238	0.0714286	0.0833333	0.0297619	0.0297619	0.00595238	0	0	0	0	0.00595238	0.00595238	0	0.0119048	0	0.00595238	0.00595238	0	0	0.380952	0	0.00595238	0.0178571
3.9	CB05HB072	0.723005	0.028169	0	0.084507	0.0798122	0.0657277	0.0187793	0.025974	0	0.012987	0.012987	0	0.11039	0.025974	0	0.0454545	0.0194805	0	0.12987	0.00649351	0	0.00649351	0	0.00649351	0.0194805	0.175325	0.012987	0.0454545	0.0194805	0	0	0	0	0	0.00649351	0.00649351	0.00649351	0	0	0.00649351	0	0	0.272727	0	0.00649351	0.0194805
3.8	CB05HB070	0.775956	0.0163934	0.0163934	0.0491803	0.114754	0.0273224	0	0.0211268	0	0	0	0	0.0633803	0.0140845	0	0.0211268	0.0140845	0	0.190141	0	0	0	0	0.00704225	0.119718	0.169014	0.028169	0.056338	0.0140845	0	0	0	0	0	0	0	0	0	0	0.0140845	0.00704225	0	0.239437	0	0	0.0211268
3.7	CB05HB068	0.715686	0.0245098	0	0.0980392	0.0882353	0.0637255	0.00980392	0	0	0.00684932	0.0136986	0	0.0616438	0.0342466	0	0.0136986	0.0205479	0	0.0890411	0.00684932	0	0.0273973	0	0	0.0205479	0.130137	0.136986	0.0547945	0	0	0	0	0	0	0	0	0.0205479	0	0	0.0136986	0	0	0.30137	0	0.00684932	0.0410959
3.6	CB05HB066	0.747899	0.0210084	0.00840336	0.109244	0.0630252	0.0504202	0	0.00561798	0	0	0.0168539	0	0.0168539	0.0337079	0	0.0337079	0.00561798	0	0.134831	0.0168539	0	0.00561798	0	0.0224719	0.0449438	0.0674157	0.0842697	0.0393258	0.0280899	0	0.00561798	0.00561798	0	0	0	0	0.0224719	0	0	0.011236	0	0	0.382022	0	0.011236	0.00561798
3.5	CB05HB064	0.724907	0.0408922	0.0260223	0.0557621	0.0892193	0.063197	0	0	0	0	0.0102564	0	0.0410256	0.0153846	0	0.0358974	0.00512821	0.00512821	0.0974359	0.0512821	0	0.00512821	0	0.00512821	0.0307692	0.0666667	0.117949	0.102564	0	0	0	0	0	0	0	0	0.0205128	0	0	0.00512821	0.00512821	0	0.353846	0	0.0102564	0.0153846
3.45	CB05HB060	0.627119	0.0254237	0.00423729	0.139831	0.105932	0.0974576	0	0.00675676	0	0	0.0202703	0	0.0540541	0.027027	0	0.0337838	0.0135135	0	0.108108	0.0202703	0	0	0	0	0.0135135	0.0810811	0.108108	0.0608108	0	0	0	0	0	0	0	0	0.027027	0	0	0.027027	0	0	0.385135	0	0.0135135	0
3.4	CB05HB062	0.651961	0.0490196	0.0147059	0.0735294	0.156863	0.0392157	0.0147059	0	0	0.0075188	0.0075188	0.0075188	0.0300752	0.0225564	0	0.0676692	0	0	0.142857	0.037594	0	0.0075188	0	0.0075188	0.0300752	0.0150376	0.135338	0.0827068	0.0075188	0	0	0	0	0	0	0	0.0150376	0	0	0.0300752	0	0	0.345865	0	0	0
3.3	CB05HB057	0.657277	0.0422535	0.00938967	0.0938967	0.117371	0.0704225	0.00938967	0.00714286	0	0	0.00714286	0	0.0714286	0.0142857	0	0.05	0.0142857	0	0.0785714	0.05	0	0.00714286	0	0	0	0.1	0.0928571	0.0214286	0.00714286	0	0	0	0	0	0	0	0.0142857	0	0	0.0357143	0.0142857	0	0.407143	0	0	0.00714286
3.25	CB05HB056	0.71831	0.0234742	0.0140845	0.117371	0.0469484	0.0704225	0.00938967	0	0	0	0.00653595	0	0.00653595	0.0196078	0	0.0196078	0.0196078	0	0.0653595	0.0849673	0	0.00653595	0	0	0.0196078	0.0261438	0.130719	0.0653595	0.00653595	0	0	0	0	0	0.00653595	0	0.00653595	0	0	0.0261438	0	0	0.477124	0	0.00653595	0
3.15	CB05HB054	0.657025	0.0289256	0.0206612	0.0826446	0.165289	0.0371901	0.00826446	0.00628931	0	0	0	0	0.0125786	0.00628931	0.00628931	0.0251572	0.0251572	0	0.132075	0.0503145	0	0	0	0	0.0125786	0.00628931	0.0628931	0.150943	0	0	0.00628931	0	0	0	0	0.0125786	0.00628931	0	0	0.0251572	0.0125786	0	0.433962	0	0.00628931	0
3	CB05HB051	0.567766	0.025641	0.021978	0.139194	0.102564	0.124542	0.018315	0.00645161	0.00645161	0	0.00645161	0	0.00645161	0.0129032	0	0.0322581	0	0.00645161	0.193548	0.0322581	0	0.0129032	0	0	0.0258065	0	0.0967742	0.0967742	0.0258065	0	0	0.00645161	0.00645161	0	0	0	0.0193548	0	0	0.0129032	0	0	0.393548	0	0	0
2.95	CB05HB050	0.611872	0.0502283	0	0.182648	0.0593607	0.0913242	0.00456621	0	0	0	0	0	0.0298507	0	0	0.0223881	0.00746269	0	0.149254	0.0298507	0	0.00746269	0	0	0.00746269	0	0.0373134	0.179104	0.0223881	0.00746269	0	0	0	0	0.0223881	0	0	0	0	0.0149254	0	0	0.425373	0	0.0373134	0
2.85	CB05HB048	0.578512	0.0330579	0.00826446	0.177686	0.0950413	0.0991736	0.00826446	0	0	0.00714286	0.0142857	0	0.0714286	0.00714286	0	0.0285714	0.0142857	0	0.0928571	0.0142857	0	0	0	0.00714286	0.0142857	0	0.0214286	0.0642857	0.0142857	0	0	0	0	0	0.0285714	0.00714286	0.00714286	0	0	0.00714286	0.00714286	0	0.535714	0	0.0357143	0
2.75	CB05HB046	0.518797	0.0338346	0.0263158	0.112782	0.116541	0.172932	0.018797	0.0144928	0.00724638	0.0144928	0.0217391	0	0.0217391	0	0	0.0144928	0	0	0.0869565	0	0	0	0	0	0	0	0.0797101	0.0942029	0	0	0	0	0	0	0.0144928	0	0.0289855	0	0	0.057971	0.00724638	0	0.507246	0	0.0289855	0
2.65	CB05HB044	0.608696	0.0316206	0.00395257	0.126482	0.126482	0.0750988	0.027668	0.0194805	0	0	0.00649351	0	0.012987	0.00649351	0	0.025974	0.0194805	0	0.12987	0.012987	0	0.00649351	0	0	0.00649351	0	0.103896	0.0714286	0.00649351	0.00649351	0	0	0	0	0.00649351	0	0	0	0	0.038961	0	0	0.487013	0	0.0324675	0
2.5	CB05HB042	0.65534	0.0631068	0.00485437	0.0873786	0.0825243	0.0825243	0.0242718	0.00740741	0	0	0.0148148	0	0	0.037037	0	0.00740741	0.0222222	0.0148148	0.148148	0.00740741	0	0	0	0.0148148	0	0	0.0740741	0.0296296	0	0	0	0	0	0	0.00740741	0	0	0	0	0.0740741	0	0	0.503704	0	0.037037	0
2.4	CB05HB040	0.593886	0.0218341	0.00873362	0.161572	0.126638	0.0786026	0.00873362	0.0367647	0	0	0.00735294	0.00735294	0.00735294	0	0	0.0147059	0.0147059	0.00735294	0.0955882	0	0	0.0147059	0	0.00735294	0	0.0147059	0.0882353	0.00735294	0.0147059	0	0	0	0	0.00735294	0	0	0	0	0	0.117647	0	0.00735294	0.477941	0	0.0514706	0
2.3	CB05HB038	0.52069	0.0551724	0.00689655	0.22069	0.110345	0.0655172	0.0206897	0.00662252	0	0	0.0198675	0.0198675	0.00662252	0	0	0.013245	0.0529801	0	0.172185	0	0	0.013245	0	0	0.00662252	0	0.0860927	0.0529801	0.00662252	0	0	0	0	0	0.00662252	0.013245	0.0198675	0	0	0.0860927	0.0198675	0.00662252	0.364238	0	0.0264901	0
2.2	CB05HB036	0.507937	0.0396825	0.00793651	0.31746	0.0992063	0.0238095	0.00396825	0.015625	0	0.0078125	0	0	0.015625	0.0078125	0	0	0.03125	0	0.179688	0	0	0.0234375	0	0	0.0078125	0.0078125	0.03125	0.101562	0.015625	0	0	0	0	0	0	0	0.015625	0	0	0.101562	0	0	0.414062	0	0.0234375	0
2.1	CB05HB034	0.510204	0.0693878	0.00816327	0.244898	0.106122	0.0489796	0.0122449	0	0	0	0.024	0	0.024	0	0	0.016	0.016	0.008	0.096	0	0	0	0	0	0	0	0.016	0.112	0	0	0	0	0.008	0	0	0	0	0	0	0.048	0.008	0	0.584	0.024	0.016	0
2	CB05HB032	0.591837	0.0653061	0.0122449	0.195918	0.0897959	0.0408163	0.00408163	0.0137931	0	0	0.0275862	0	0	0	0	0.0344828	0.00689655	0	0.0965517	0	0	0	0	0	0	0.00689655	0.00689655	0.158621	0.0137931	0	0	0	0	0	0.00689655	0	0	0	0	0.124138	0	0	0.489655	0	0.0137931	0
1.9	CB05HB030	0.620408	0.0204082	0.0122449	0.22449	0.0367347	0.0693878	0.0163265	0	0	0.00657895	0.0328947	0	0	0	0	0	0	0.00657895	0.0855263	0.00657895	0.00657895	0	0	0	0	0	0.0263158	0.0789474	0	0	0	0	0.0328947	0	0	0	0	0	0	0.0592105	0	0	0.618421	0	0.0394737	0
1.8	CB05HB028	0.413897	0.0453172	0.021148	0.404834	0.0453172	0.0574018	0.0120846	0.0218978	0	0	0.0145985	0	0.00729927	0	0	0.00729927	0	0	0.0291971	0	0	0.00729927	0	0	0	0.00729927	0.00729927	0.0437956	0	0	0	0	0	0.00729927	0.0364964	0	0.00729927	0	0	0.0510949	0	0	0.715328	0	0.0364964	0
1.7	CB05HB026	0.443425	0.0458716	0.0122324	0.287462	0.0948012	0.110092	0.00611621	0	0	0	0.00689655	0	0.00689655	0	0	0.0206897	0.0206897	0	0.124138	0	0	0	0	0	0	0	0.0137931	0.062069	0	0	0	0	0	0	0.00689655	0	0	0	0	0.241379	0	0	0.468966	0	0.0275862	0
1.6	CB05HB024	0.463068	0.0539773	0.0284091	0.241477	0.125	0.0852273	0.00284091	0	0	0	0.0122699	0	0	0	0	0.0306748	0.0184049	0	0.0920245	0.00613497	0.00613497	0.0184049	0	0	0.0184049	0.00613497	0.0490798	0.0490798	0	0	0	0	0	0	0	0	0	0	0.0122699	0.184049	0	0	0.472393	0	0.0245399	0
1.5	CB05HB022	0.528875	0.0547112	0.0334347	0.18541	0.100304	0.0911854	0.00607903	0	0	0	0.00574713	0	0	0.00574713	0	0.0229885	0.0114943	0.00574713	0.045977	0.00574713	0	0.0114943	0	0	0	0	0.103448	0.0402299	0	0	0	0	0.00574713	0.0114943	0	0	0.00574713	0	0	0.252874	0	0	0.425287	0	0.0402299	0
Sample info		Estimated absolute palynomorph abundances at Hampden section (number of palynomorphs per gram dry weight sediment)							Estimated absolute dinocyst abundances at Hampden section (number of dinocysts per gram dry weight sediment)
stratigraphic height (m)	Sample code	dinocysts	nothofagus pollen	bisaccate pollen	other pollen	spores	acritarchs	prasinophytes	Achomosphaera spp. (pars)	Alisocysta circumtabulata	Batiacasphaera cassicula	Cerebrocysta waipawaensis	Cleistosphaeridium spp. (pars)	Cordosphaeridium fibrospinosum	Cribroperidinium tenuitabulatum	Danea crassimurata	Dapsilidinium spp.	Deflandrea antarctica	Diphyes colligerum	Elytrocysta brevis	Enneadocysta dictyostila	Eocladopyxis spp. (pars)	Fibrocysta spp.	Glaphyrocysta delicata	Heteraulacacysta spp.	Hystiocysta / Elytrocysta spp. (pars)	Hystrichokolpoma rigaudiae	Hystrichosphaeridium tubiferum	Impagidinium dispertitum	Impagidinium maculatum	Lejeunecysta spp. (pars)	Melitasphaeridium pseudorecurvatum	Octodinium askinae	Operculodinium spp. (pars)	Paucispaeridium spp.	Phthanoperidinium stockmansii	Polysphaeridium spp.	Pyxidinopsis delicata	Rhombodinium rhomboideum	Samlandia septata	Senegalinium spp. (pars)	Spinidinium macmurdoense	Spinidinium schellenbergii	Spiniferites spp. (pars)	Stoveracysta spp. (pars)	Vozzhennikovia apertura	Wilsonidium echinosuturatum
5.2	CB05HB098	1867.6	144.775	130.298	651.49	390.894	173.731	72.3877	14.4775	0	0	28.9551	0	28.9551	0	0	115.82	72.3877	14.4775	361.939	0	0	14.4775	0	0	14.4775	14.4775	217.163	43.4326	28.9551	0	0	0	0	0	14.4775	0	43.4326	14.4775	0	115.82	0	0	694.922	0	14.4775	0
5.1	CB05HB096	1465.43	111.865	22.3729	425.086	246.102	201.356	11.1865	67.1188	0	0	67.1188	0	33.5594	0	0	22.3729	67.1188	0	190.17	0	0	11.1865	0	0	11.1865	11.1865	190.17	22.3729	11.1865	0	0	0	0	11.1865	0	0	33.5594	0	0	100.678	0	0	615.256	0	0	0
5	CB05HB094	1449.77	101.147	67.4313	449.542	292.202	213.532	56.1927	22.4771	0	0	0	0	33.7156	11.2385	0	67.4313	56.1927	0	213.532	11.2385	0	22.4771	0	0	22.4771	33.7156	112.385	33.7156	0	0	0	0	0	0	33.7156	0	22.4771	0	0	78.6698	0	0	674.313	0	0	0
4.9	CB05HB092	1751.61	54.0621	10.8124	345.998	216.249	75.687	32.4373	54.0621	0	0	0	0	21.6249	0	0	86.4994	86.4994	0	270.311	0	0	32.4373	0	0	43.2497	21.6249	108.124	32.4373	21.6249	0	0	0	0	0	10.8124	0	10.8124	0	10.8124	64.8746	0	0	864.994	0	10.8124	0
4.8	CB05HB090	2704.32	131.46	75.1199	262.92	281.7	225.36	56.3399	37.5599	0	0	37.5599	0	56.3399	18.78	0	150.24	93.8998	0	582.179	0	0	0	0	0	93.8998	18.78	169.02	56.3399	37.5599	18.78	0	0	0	0	0	18.78	18.78	0	0	244.14	0	0	1032.9	0	18.78	0
4.7	CB05HB088	1817.12	172.035	64.5131	236.548	96.7697	161.283	53.7609	21.5044	0	0	21.5044	0	64.5131	10.7522	0	86.0175	64.5131	0	268.805	21.5044	0	32.2566	0	10.7522	21.5044	21.5044	107.522	32.2566	0	0	0	21.5044	0	53.7609	10.7522	21.5044	21.5044	0	0	75.2653	10.7522	0	806.414	0	0	10.7522
4.6	CB05HB086	2391.25	90.5777	72.4621	742.737	452.888	326.08	54.3466	18.1155	0	0	18.1155	0	36.2311	18.1155	0	235.502	36.2311	0	253.618	36.2311	0	18.1155	0	0	54.3466	18.1155	199.271	36.2311	36.2311	0	0	0	0	54.3466	18.1155	0	18.1155	0	18.1155	217.386	0	0	1032.59	0	0	18.1155
4.5	CB05HB084	1116.35	43.6073	8.72146	340.137	287.808	95.9361	26.1644	17.4429	0	0	17.4429	0	43.6073	17.4429	0	87.2146	17.4429	0	218.037	52.3288	0	17.4429	8.72146	0	8.72146	26.1644	61.0502	17.4429	0	0	0	0	0	17.4429	17.4429	0	8.72146	0	0	52.3288	0	0	401.187	0	0	8.72146
4.4	CB05HB082	2805.33	77.9259	116.889	759.778	350.667	370.148	58.4444	58.4444	0	0	19.4815	0	155.852	97.4074	0	116.889	19.4815	0	623.407	175.333	0	19.4815	0	38.963	136.37	77.9259	136.37	58.4444	0	0	0	19.4815	0	38.963	38.963	38.963	58.4444	0	0	97.4074	0	0	759.778	0	19.4815	0
4.3	CB05HB080	1262.01	26.2919	43.8198	140.224	70.1118	289.211	0	17.5279	8.76397	0	0	0	17.5279	35.0559	0	43.8198	17.5279	0	61.3478	87.6397	0	0	0	8.76397	52.5838	78.8757	140.224	17.5279	17.5279	0	0	8.76397	0	0	0	8.76397	35.0559	0	8.76397	78.8757	8.76397	0	490.782	0	0	17.5279
4.2	CB05HB078	3232.15	149.835	64.215	299.67	85.62	278.265	0	128.43	0	21.405	64.215	0	171.24	21.405	0	278.265	85.62	0	663.555	21.405	0	85.62	0	0	107.025	85.62	321.075	64.215	64.215	0	0	0	0	0	21.405	0	21.405	0	0	21.405	0	0	920.414	0	0	64.215
4.1	CB05HB076	3641.14	70.4737	117.456	399.351	140.947	305.386	0	117.456	0	23.4912	70.4737	0	281.895	211.421	0	117.456	117.456	0	563.79	46.9825	0	46.9825	0	0	187.93	140.947	422.842	117.456	70.4737	0	0	0	0	0	0	46.9825	23.4912	0	0	0	0	0	892.667	0	0	140.947
3.95	CB05HB073	6821.1	324.815	40.6018	487.222	406.018	121.805	0	40.6018	0	0	0	0	527.824	324.815	0	243.611	121.805	0	933.842	40.6018	0	40.6018	0	40.6018	487.222	568.425	203.009	203.009	40.6018	0	0	0	0	40.6018	40.6018	0	81.2036	0	40.6018	40.6018	0	0	2598.52	0	40.6018	121.805
3.9	CB05HB072	5537.54	215.748	0	647.245	611.287	503.413	143.832	143.832	0	71.9161	71.9161	0	611.287	143.832	0	251.706	107.874	0	719.161	35.958	0	35.958	0	35.958	107.874	970.867	71.9161	251.706	107.874	0	0	0	0	0	35.958	35.958	35.958	0	0	35.958	0	0	1510.24	0	35.958	107.874
3.8	CB05HB070	7395.65	156.246	156.246	468.738	1093.72	260.41	0	156.246	0	0	0	0	468.738	104.164	0	156.246	104.164	0	1406.22	0	0	0	0	52.082	885.395	1249.97	208.328	416.656	104.164	0	0	0	0	0	0	0	0	0	0	104.164	52.082	0	1770.79	0	0	156.246
3.7	CB05HB068	7157.76	245.129	0	980.515	882.464	637.335	98.0515	0	0	49.0258	98.0515	0	441.232	245.129	0	98.0515	147.077	0	637.335	49.0258	0	196.103	0	0	147.077	931.49	980.515	392.206	0	0	0	0	0	0	0	0	147.077	0	0	98.0515	0	0	2157.13	0	49.0258	294.155
3.6	CB05HB066	2312.16	64.9482	25.9793	337.731	194.845	155.876	0	12.9896	0	0	38.9689	0	38.9689	77.9379	0	77.9379	12.9896	0	311.751	38.9689	0	12.9896	0	51.9586	103.917	155.876	194.845	90.9275	64.9482	0	12.9896	12.9896	0	0	0	0	51.9586	0	0	25.9793	0	0	883.296	0	25.9793	12.9896
3.5	CB05HB064	1910.25	107.758	68.5731	146.942	235.108	166.535	0	0	0	0	19.5923	0	78.3692	29.3885	0	68.5731	9.79615	9.79615	186.127	97.9615	0	9.79615	0	9.79615	58.7769	127.35	225.311	195.923	0	0	0	0	0	0	0	0	39.1846	0	0	9.79615	9.79615	0	675.934	0	19.5923	29.3885
3.45	CB05HB060	1589.04	64.4204	10.7367	354.312	268.418	246.945	0	10.7367	0	0	32.2102	0	85.8939	42.947	0	53.6837	21.4735	0	171.788	32.2102	0	0	0	0	21.4735	128.841	171.788	96.6306	0	0	0	0	0	0	0	0	42.947	0	0	42.947	0	0	611.994	0	21.4735	0
3.4	CB05HB062	1641.97	123.457	37.037	185.185	395.061	98.7653	37.037	0	0	12.3457	12.3457	12.3457	49.3827	37.037	0	111.111	0	0	234.568	61.7283	0	12.3457	0	12.3457	49.3827	24.6913	222.222	135.802	12.3457	0	0	0	0	0	0	0	24.6913	0	0	49.3827	0	0	567.901	0	0	0
3.3	CB05HB057	1666.24	107.115	23.8034	238.034	297.542	178.525	23.8034	11.9017	0	0	11.9017	0	119.017	23.8034	0	83.3119	23.8034	0	130.919	83.3119	0	11.9017	0	0	0	166.624	154.722	35.7051	11.9017	0	0	0	0	0	0	0	23.8034	0	0	59.5085	23.8034	0	678.397	0	0	11.9017
3.25	CB05HB056	2242.47	73.2832	43.9699	366.416	146.566	219.85	29.3133	0	0	0	14.6566	0	14.6566	43.9699	0	43.9699	43.9699	0	146.566	190.536	0	14.6566	0	0	43.9699	58.6266	293.133	146.566	14.6566	0	0	0	0	0	14.6566	0	14.6566	0	0	58.6266	0	0	1069.94	0	14.6566	0
3.15	CB05HB054	5452.64	240.053	171.467	685.867	1371.73	308.64	68.5867	34.2933	0	0	0	0	68.5867	34.2933	34.2933	137.173	137.173	0	720.16	274.347	0	0	0	0	68.5867	34.2933	342.933	823.04	0	0	34.2933	0	0	0	0	68.5867	34.2933	0	0	137.173	68.5867	0	2366.24	0	34.2933	0
3	CB05HB051	4133.49	186.674	160.006	1013.37	746.696	906.702	133.338	26.6677	26.6677	0	26.6677	0	26.6677	53.3354	0	133.338	0	26.6677	800.031	133.338	0	53.3354	0	0	106.671	0	400.015	400.015	106.671	0	0	26.6677	26.6677	0	0	0	80.0031	0	0	53.3354	0	0	1626.73	0	0	0
2.95	CB05HB050	3023.01	248.158	0	902.391	293.277	451.196	22.5598	0	0	0	0	0	90.2391	0	0	67.6793	22.5598	0	451.196	90.2391	0	22.5598	0	0	22.5598	0	112.799	541.435	67.6793	22.5598	0	0	0	0	67.6793	0	0	0	0	45.1196	0	0	1285.91	0	112.799	0
2.85	CB05HB048	1912.57	109.289	27.3224	587.431	314.207	327.868	27.3224	0	0	13.6612	27.3224	0	136.612	13.6612	0	54.6447	27.3224	0	177.595	27.3224	0	0	0	13.6612	27.3224	0	40.9835	122.951	27.3224	0	0	0	0	0	54.6447	13.6612	13.6612	0	0	13.6612	13.6612	0	1024.59	0	68.3059	0
2.75	CB05HB046	3223.51	210.229	163.511	700.762	724.121	1074.5	116.794	46.7175	23.3587	46.7175	70.0762	0	70.0762	0	0	46.7175	0	0	280.305	0	0	0	0	0	0	0	256.946	303.664	0	0	0	0	0	0	46.7175	0	93.4349	0	0	186.87	23.3587	0	1635.11	0	93.4349	0
2.65	CB05HB044	2263.93	117.607	14.7008	470.427	470.427	279.316	102.906	44.1025	0	0	14.7008	0	29.4017	14.7008	0	58.8034	44.1025	0	294.017	29.4017	0	14.7008	0	0	14.7008	0	235.213	161.709	14.7008	14.7008	0	0	0	0	14.7008	0	0	0	0	88.205	0	0	1102.56	0	73.5042	0
2.5	CB05HB042	1946.6	187.451	14.4193	259.547	245.128	245.128	72.0965	14.4193	0	0	28.8386	0	0	72.0965	0	14.4193	43.2579	28.8386	288.386	14.4193	0	0	0	28.8386	0	0	144.193	57.6772	0	0	0	0	0	0	14.4193	0	0	0	0	144.193	0	0	980.512	0	72.0965	0
2.4	CB05HB040	1839.32	67.6222	27.0489	500.404	392.209	243.44	27.0489	67.6222	0	0	13.5244	13.5244	13.5244	0	0	27.0489	27.0489	13.5244	175.818	0	0	27.0489	0	13.5244	0	27.0489	162.293	13.5244	27.0489	0	0	0	0	13.5244	0	0	0	0	0	216.391	0	13.5244	879.088	0	94.671	0
2.3	CB05HB038	2067.39	219.061	27.3826	876.244	438.122	260.135	82.1478	13.6913	0	0	41.0739	41.0739	13.6913	0	0	27.3826	109.53	0	355.974	0	0	27.3826	0	0	13.6913	0	177.987	109.53	13.6913	0	0	0	0	0	13.6913	27.3826	41.0739	0	0	177.987	41.0739	13.6913	753.022	0	54.7652	0
2.2	CB05HB036	1366.17	106.732	21.3463	853.853	266.829	64.039	10.6732	21.3463	0	10.6732	0	0	21.3463	10.6732	0	0	42.6927	0	245.483	0	0	32.0195	0	0	10.6732	10.6732	42.6927	138.751	21.3463	0	0	0	0	0	0	0	21.3463	0	0	138.751	0	0	565.678	0	32.0195	0
2.1	CB05HB034	1722.95	234.322	27.5672	827.017	358.374	165.403	41.3509	0	0	0	41.3509	0	41.3509	0	0	27.5672	27.5672	13.7836	165.403	0	0	0	0	0	0	0	27.5672	192.971	0	0	0	0	13.7836	0	0	0	0	0	0	82.7017	13.7836	0	1006.2	41.3509	27.5672	0
2	CB05HB032	1640.84	181.058	33.9483	543.173	248.954	113.161	11.3161	22.6322	0	0	45.2644	0	0	0	0	56.5805	11.3161	0	158.425	0	0	0	0	0	0	11.3161	11.3161	260.27	22.6322	0	0	0	0	0	11.3161	0	0	0	0	203.69	0	0	803.444	0	22.6322	0
1.9	CB05HB030	1308.47	43.0418	25.8251	473.46	77.4753	146.342	34.4335	0	0	8.60836	43.0418	0	0	0	0	0	0	8.60836	111.909	8.60836	8.60836	0	0	0	0	0	34.4335	103.3	0	0	0	0	43.0418	0	0	0	0	0	0	77.4753	0	0	809.186	0	51.6502	0
1.8	CB05HB028	916.398	100.335	46.8232	896.33	100.335	127.092	26.7561	20.0671	0	0	13.3781	0	6.68903	0	0	6.68903	0	0	26.7561	0	0	6.68903	0	0	0	6.68903	6.68903	40.1342	0	0	0	0	0	6.68903	33.4452	0	6.68903	0	0	46.8232	0	0	655.525	0	33.4452	0
1.7	CB05HB026	654.49	67.7059	18.0549	424.29	139.925	162.494	9.02745	0	0	0	4.51372	0	4.51372	0	0	13.5412	13.5412	0	81.247	0	0	0	0	0	0	0	9.02745	40.6235	0	0	0	0	0	0	4.51372	0	0	0	0	157.98	0	0	306.933	0	18.0549	0
1.6	CB05HB024	798.201	93.0418	48.9694	416.24	215.465	146.908	4.89694	0	0	0	9.79388	0	0	0	0	24.4847	14.6908	0	73.4541	4.89694	4.89694	14.6908	0	0	14.6908	4.89694	39.1755	39.1755	0	0	0	0	0	0	0	0	0	0	9.79388	146.908	0	0	377.064	0	19.5878	0
1.5	CB05HB022	836.04	86.4869	52.8531	293.094	158.559	144.145	9.60965	0	0	0	4.80483	0	0	4.80483	0	19.2193	9.60965	4.80483	38.4386	4.80483	0	9.60965	0	0	0	0	86.4869	33.6338	0	0	0	0	4.80483	9.60965	0	0	4.80483	0	0	211.412	0	0	355.557	0	33.6338	0

## Sheet: Dinolist
dinocyst taxon	abbreviation	biogeo	biogeo alt	cyst	1170	1172	Latrobe	Hampden	notes		Biogeo abbreviations
Achilleodinium biformoides	Ach_bi	c	c	g			Latrobe				m	mid-/low-latitude
Achomosphaera membraniphora	Ach_mem	c	c	g		1172					c	cosmopolitan
Achomosphaera ramulifera	Ach_ram	c	c	g		1172					b	bipolar
Achomosphaera spp. (pars)	Ach_spp	c	c	g			Latrobe	Hampden			tf	endemic "TF"
Adnatosphaeridium spp.	Ad_spp	c	c	g			Latrobe				e	endemic SO
Alisocysta circumtabulata	Ali_cir	c	c	g				Hampden			o	other (unknown or ambivalent)
Alterbidinium acutulum	Alt_acu	e	e	p		1172					wetz	wetzeliellioids (here considered cosmopolitan, could also be considered mid-/low-latitude based on their warm affinity)
Alterbidinium distinctum	Alt_dis	tf	tf	p	1170	1172					gonio	goniodomids (here considered cosmopolitan, could also be considered mid-/low-latitude based on their warm affinity)
Apectodinium homomorphum	Ape_hom	m	wetz	p		1172
Apteodinium australiense	Apt_aus	m	m	g		1172
Arachnodinium antarcticum	Ara_ant	tf	tf	g	1170	1172
Areoligera Cpx. (pars)	Areo_cpx	c	c	g		1172	Latrobe
Batiacasphaera cassicula	Bat_cass	e	e	g		1172		Hampden
Batiacasphaera spp.	Bat_spp	m	m	g		1172	Latrobe
Brigantedinium spp.	Brig_spp	c	c	p		1172
Cerebrocysta bartonensis	Cer_bar	m	m	g	1170	1172
Cerebrocysta spp. (pars)	Cer_spp	c	c	g		1172
Cerebrocysta waipawaensis	Cer_wai	c	c	g	1170			Hampden
Charlesdowniea coleothrypta	Char_col	c	wetz	p		1172
Cleistosphaeridium diversispinosum	Cle_div	m	m	g		1172
Cleistosphaeridium placacanthum	Cle_pla	m	m	g		1172
Cleistosphaeridium spp. (pars)	Cle_spp	c	c	g			Latrobe	Hampden
Cordosphaeridium Cpx. (pars)	Cord_spp	c	c	g	1170		Latrobe
Cordosphaeridium fibrospinosum	Cord_fib	m	m	g	1170	1172	Latrobe	Hampden
Cordosphaeridium funiculatum	Cord_fun	c	c	g	1170
Cordosphaeridium minimum	Cord_min	m	m	g	1170	1172
Corrudinium incompositum	Cor_inc	m	m	g	1170		Latrobe
Corrudinium regulare	Corru_reg	tf	tf	g		1172
Corrudinium spp. (pars)	Corru_spp	o	o	g			Latrobe
Cribroperidinium spp. (pars)	Cri_spp	c	c	g		1172
Cribroperidinium tenuitabulatum	Cri_ten	c	c	g				Hampden
Danea crassimurata	Dan_cra	c	c	g				Hampden
Dapsilidinium spp.	Daps_spp	m	m	g		1172	Latrobe	Hampden
Deflandrea antarctica	Def_ant	tf	tf	p	1170	1172		Hampden
Deflandrea convexa	Def_con	tf	tf	p	1170	1172
Deflandrea cygniformis	Def_cyg	tf	tf	p	1170	1172
Deflandrea phosphoritica	Def_pho	m	m	p	1170	1172	Latrobe
Deflandrea sp. A cf. Brinkhuis 2003	Def_spA	tf	tf	p		1172
Deflandrea spp. (pars)	Def_spp	o	o	p	1170	1172	Latrobe
Diphyes colligerum	Diph_col	c	c	g		1172		Hampden
Diphyes spp. (pars)	Diph_spp	c	c	g			Latrobe
Distatodinium ellipticum	Dis_ell	m	m	g			Latrobe
Distatodinium paradoxum	Dis_par	m	m	g		1172	Latrobe
Dracodinium rhomboideum	Dra_rho	c	wetz	p			Latrobe
Elytrocysta brevis	Ely_bre	c	c	g	1170			Hampden
Enneadocysta brevistila	Enn_bre	tf	tf	g	1170
Enneadocysta dictyostila	Enn_dic	tf	tf	g	1170	1172		Hampden
Enneadocysta multicornuta	Enn_mul	c	c	g	1170	1172	Latrobe
Enneadocysta pectiniformis	Enn_pec	m	m	g			Latrobe
Enneadocysta spp. (pars)	Enn_spp	o	o	g			Latrobe
Enneadocysta-Oligosphaeridum intermediate	Enn_Oli	o	o	g			Latrobe
Eocladopyxis peniculata	Eoc_pen	m	gonio	g	1170
Eocladopyxis spp. (pars)	Eoc_spp	m	gonio	g	1170	1172	Latrobe	Hampden
Fibrocysta spp.	Fib_spp	c	c	g		1172		Hampden
Gelatia inflata	Gel_inf	b	b	g		1172
Glaphyrocysta delicata	Gla_del	m	m	g		1172		Hampden
Glaphyrocysta intricata	Gla_int	m	m	g		1172
Glaphyrocysta pastielsii	Gla_pas	m	m	g	1170	1172
Glaphyrocysta retiintexta	Gla_ret	m	m	g		1172
Hemiplacophora semilunifera	Hem_sem	c	c	g			Latrobe
Heteraulacacysta spp.	Het_spp	c	gonio	g			Latrobe	Hampden
Homotryblium spp.	Hom_spp	c	gonio	g	1170
Hystiocysta / Elytrocysta spp. (pars)	Hcyst_Ely	c	c	g		1172	Latrobe	Hampden
Hystrichokolpoma rigaudiae	Hpolma_rig	m	m	g		1172		Hampden
Hystrichokolpoma spinosum	Hpoma_spi	m	m	g		1172
Hystrichokolpoma spp. (pars)	Hpolma_spp	m	m	g		1172	Latrobe
Hystrichokolpoma truncatum	Hpolma_tru	m	m	g		1172
Hystrichosphaeridium truswelliae	Hsphae_tru	c	c	g	1170	1172
Hystrichosphaeridium tubiferum	Hsphae_tub	m	m	g		1172	Latrobe	Hampden
Impagidinium dispertitum	Imp_dis	m	m	g		1172		Hampden
Impagidinium maculatum	Imp_mac	m	m	g	1170	1172		Hampden
Impagidinium parvireticulatum	Imp_par	m	m	g	1170	1172
Impagidinium spp. (pars)	Imp_spp	o	o	g	1170	1172	Latrobe
Impagidinium victorianum	Imp_vict	m	m	g		1172
Kallosphaeridium spp.	Kal_spp	c	c	g		1172	Latrobe
Lejeunecysta hyalina	Lej_hya	c	c	p		1172
Lejeunecysta spp. (pars)	Lej_spp	c	c	p	1170		Latrobe	Hampden
Lingulodinium machaerophorum	Ling_mac	c	c	g		1172
Lingulodinium spp. (pars)	Ling_spp	c	c	g			Latrobe
Lophocysta sulcolimbata	Lop_sul	m	m	g	1170	1172
Melitasphaeridium pseudorecurvatum	Mel_pseu	c	c	g			Latrobe	Hampden
Membranosphaera spp.	Mem_spp	m	m	g		1172
Microdinium spp.	Mic_spp	c	c	g		1172
Nematosphaeropsis labyrinthus	Nem_lab	c	c	g		1172
Octodinium askiniae	Oct_ask	tf	tf	p	1170	1172		Hampden
Operculodinium centrocarpum	Ope_cen	c	c	g	1170	1172
Operculodinium spp. (pars)	Oper_spp	c	c	g		1172	Latrobe	Hampden
Paucispaeridium spp.	Pau_spp	o	o	o	1170	1172		Hampden
Pentadinium spp.	Pen_spp	c	c	g			Latrobe
Phthanoperidinium comatum	Pht_com	c	c	p		1172	Latrobe		based on in prep. dinocyst results IODP Site U1408 and U1410
Phthanoperidinium spp. (pars)	Pht_spp	o	o	p		1172	Latrobe
Phthanoperidinium stockmansii	Pht_sto	c	c	p	1170	1172		Hampden	based on in prep. dinocyst results IODP Site U1408 and U1410
Polysphaeridium spp.	Poly_spp	m	gonio	g		1172		Hampden
Protoperidinium sp. A	Proto_spA	?	?	p		1172			uncertain biogeographic affinity
Pyxidinopsis delicata	Pyx_del	e	e	g		1172		Hampden
Pyxidinopsis sp. A	Pyx_spA	?	?	g		1172			uncertain biogeographic affinity
Pyxidinopsis waipawaensis	Pyx_wai	e	e	g		1172
Reticulatosphaera actinocoronata	Ret_act	c	c	g		1172
Rhombodinium rhomboideum	Rho_rho	c	wetz	p				Hampden
Rhombodinium spp.	Rho_spp	c	wetz	p		1172
Samlandia septata	Sam_del	m	m	g		1172		Hampden
Schematophora speciosa	Sche_spec	m	m	g		1172
Selenopemphix spp.	Sel_spp.	c	c	p	1170	1172
Senegalinium sp. A brown	Sen_spA	c	c	p		1172
Senegalinium sp. B transparent	Sen_spB	c	c	p		1172
Senegalinium spp. (pars)	Sen_spp	c	c	p		1172	Latrobe	Hampden
Spinidinium colemanii	Spi_col	m	m	p	1170
Spinidinium macmurdoense	Spi_mac	b	b	p	1170	1172		Hampden
Spinidinium schellenbergii	Spi_sch	tf	tf	p	1170	1172		Hampden
Spiniferites pseudofurcatus-type	Spi_pseu	c	c	g			Latrobe
Spiniferites ramosus	Spinif_ram	c	c	g		1172
Spiniferites sp. B cf. Brinkhuis 2003	Spinif_spB	c	c	g		1172
Spiniferites spp. (pars)	Spinif_spp	c	c	g	1170	1172	Latrobe	Hampden
Stoveracysta kakanuensis	Sto_kak	e	e	g		1172
Stoveracysta ornata	Sto_orn	c	c	g		1172
Stoveracysta spp. (pars)	Sto_evi	c	c	g				Hampden
Tectatodinium pellitum	Tec_pel	m	m	g	1170		Latrobe
Thalassiphora pelagica	Tha_pel	c	c	g	1170	1172
Thalassiphora spp. (pars)	Tha_spp	c	c	g			Latrobe
Turbiosphaera filosa	Turb_fil	m	m	g		1172
Vozzhennikovia apertura	Voz_ape	b	b	p	1170	1172		Hampden
Vozzhennikovia netrona	Voz_net	tf	tf	p	1170	1172
Vozzhennikovia spp. (pars)	Voz_spp	b	b	p	1170
Vozzhennikovia stickleyae	Voz_sti	tf	tf	p	1170	1172
Wetzellioid indet.	Wetz_spp	c	wetz	p			Latrobe
Wilsonidium echinosuturatum	Wil_ech	c	wetz	p		1172		Hampden	based on in prep. dinocyst results IODP Site U1408 and U1410
Wilsonidium ornatum	Wil_orn	m	wetz	p		1172
Dinocyst indet.	Dino_indet	o	o	o	1170
Dinocyst G-cyst indet.	Gcyst_indet	o	o	g			Latrobe
Dinocyst P-cyst indet.	Pcyst_indet	o	o	p
