# Supplementary material for: Surface-circulation change in the Southern Ocean across the Middle Eocene Climatic Optimum: inferences from dinoflagellate cysts and biomarker paleothermometry
Source: Copernicus journal article supplement (doi:10.5194/cp-2019-35), 2019-04-04
Supplement: Supplementary file 1 [file cp-2019-35-supplement.zip]

## Supplementary figures

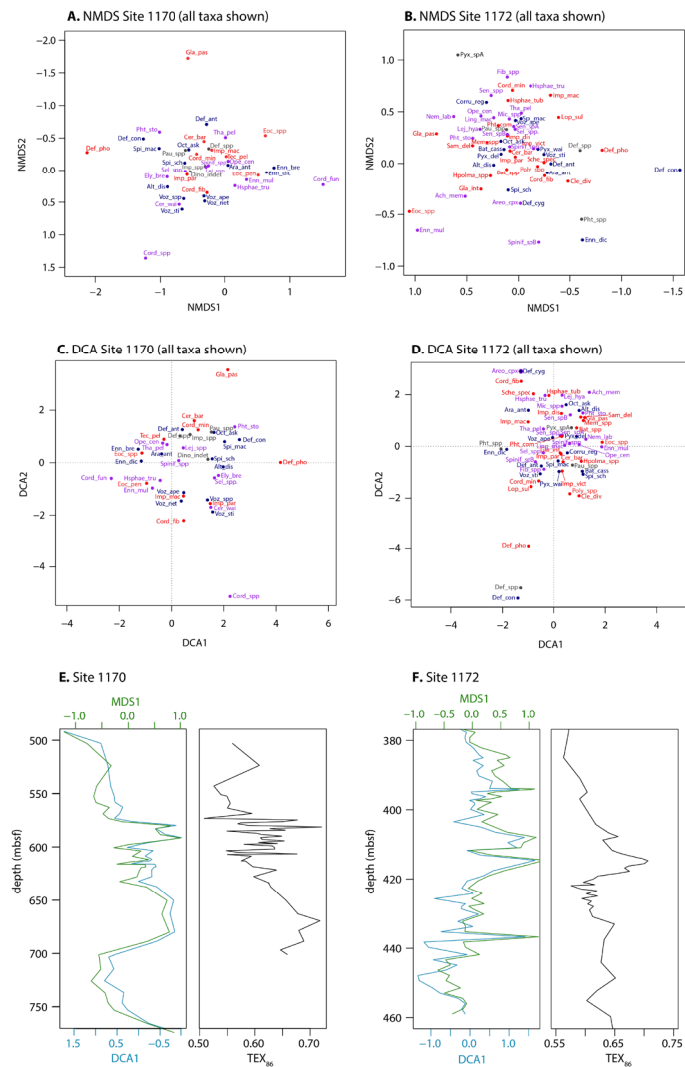

**Supplementary Figure 1.** Additional ordination results. Nonmetric multidimensional scaling (NMDS) ordination diagram for the dinocyst assemblage data of Site 1170 (**a**) and Site 1172 (**b**). Detrended correspondence analysis (DCA) ordination diagram for the dinocyst assemblage data of Site 1170 (**c**) and Site 1172 (**d**). Species scores in a-d as circles, colour-coded by biogeographic affinity (red, mid-low latitude; purple, cosmopolitan; blue, endemic; grey, not assigned). Full names for dinocyst abbreviations can be found in the Supplementary Datafile. First axis of DCA (blue) and NMDS (green) analysis of Site 1170 (**e**) and Site 1172 (**f**), together with the respective TEX<sub>86</sub> records (black).

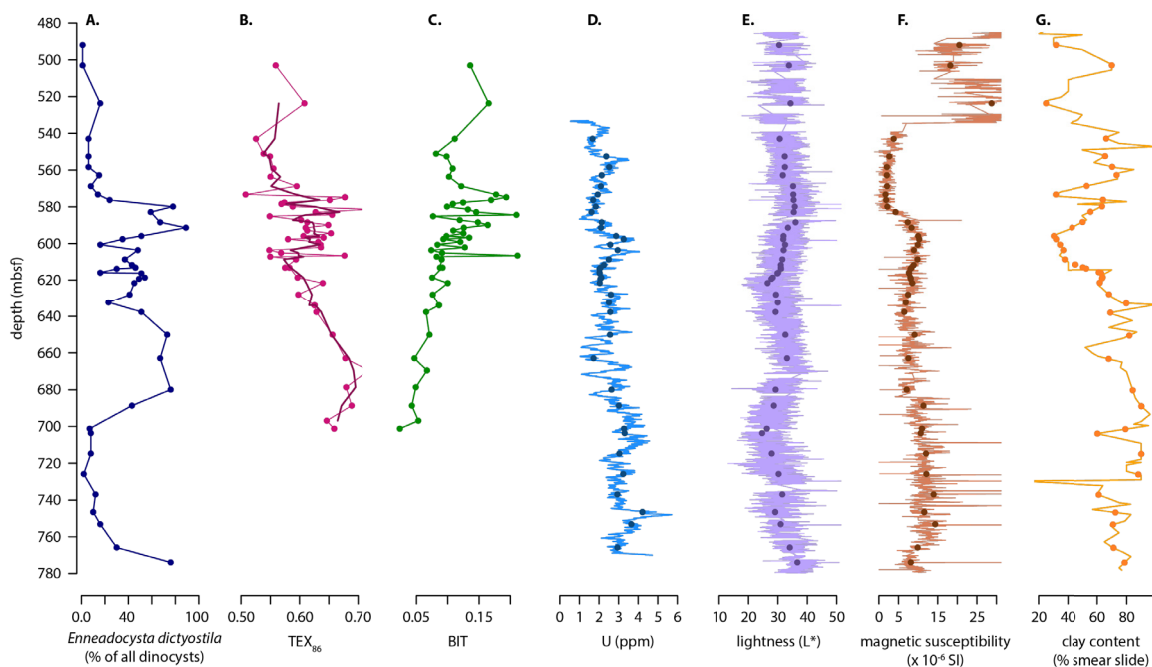

**Supplementary Figure 2.** Environmental proxy records over the MECO interval of Site 1170, as used in CCA analysis (b-g). Original data plotted as line, data interpolated to depth of dinocyst samples plotted as dots. Plotted against depth in metres below sea level. **(a)** Relative abundance of *Enneadocysta dictyostila* (percentage of total dinocyst assemblage; dark blue dots and line). **(b)** TEX<sub>86</sub> (pink dots and line), with three-point moving average (purple lines). **(c)** BIT (green dots and line). **(d)** Sedimentary uranium content (ppm; blue dots and line). **(e)** Spectrophotometric lightness (CIELAB L\*; purple dots and line). **(f)** Core-measured magnetic susceptibility ( $\times 10^{-6}$  SI). **(g)** Clay content (% of smear slide). Data in panels d-g from Exon et al. (2001).

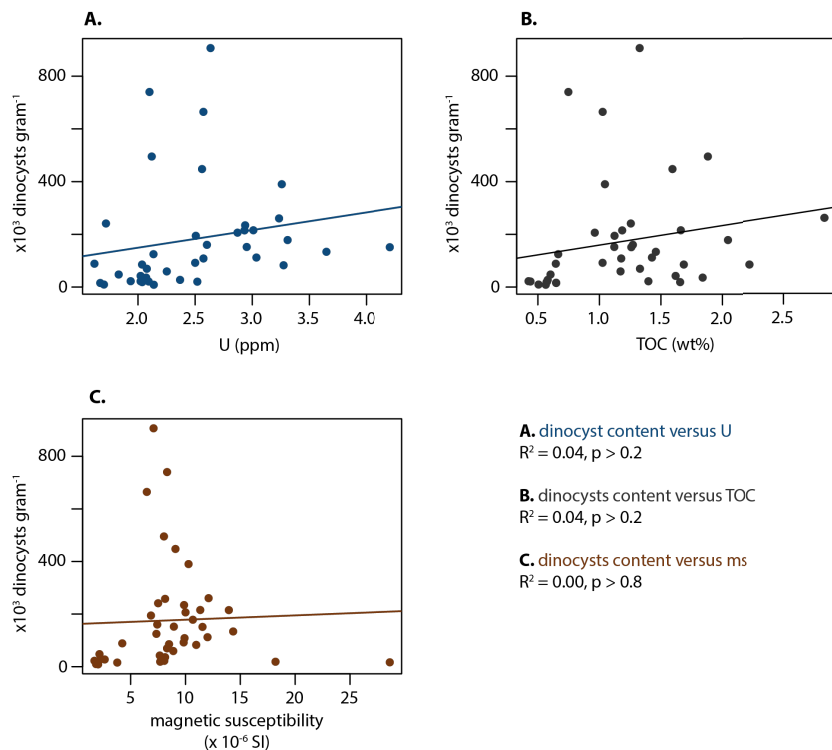

**Supplementary Figure 3.** Scatter plots and regression analysis of sedimentary dinocyst content as a function of selected proxy records of Site 1170, indicating no significant correlation. **(a)** Dinoflagellate cyst content (cysts per gram of dry sediment) against uranium content (ppm). **(b)** Dinoflagellate cyst content (cysts per gram of dry sediment) against total organic carbon content (weight percentage). **(c)** Dinoflagellate cyst content (cysts per gram of dry sediment) against magnetic susceptibility ( $\times 10^{-6}$  SI). U, TOC and ms data from Exon et al. (2001).
